# Supplementary material for: Checklist and provisional atlas of singing cicadas (Hemiptera: Cicadidae) of Bulgaria, based on bioacoustics
Source: Biodivers Data J. 2020 Oct 9;8:e54424. doi: 10.3897/BDJ.8.e54424 (PMC7567745; doi:10.3897/BDJ.8.e54424)
Supplement: Supplementary material 1 — Cicada orni faunistic data. Checklist and provisional atlas of singing cicadas (Hemiptera: Cicadidae) of Bulgaria, based on bioacoustics [file bdj-08-e54424-s001.csv]

typeStatus	catalogNumber	recordedBy	individualID	individualCount	sex	lifeStage	disposition	scientificName	taxonRank	continent	country	countryCode	stateProvince	municipality	locality	minimumElevationInMeters	decimalLatitude	decimalLongitude	geodeticDatum	georeferencedBy	georeferenceProtocol	identifiedBy	dateIdentified	eventDate	fieldNotes	bibliographicCitation	institutionCode	collectionCode	basisOfRecord
Other material	TGG-002	M. Gogala, T. Trilar, I. Gjonov, K. Prosenc Trilar						Cicada orni	species	Europe	Bulgaria	BG	Kardzhali	Kirkovo	Gorno Kapinovo, Giumurdzhiyski Snezhnik, Hvoynova Polyana	917	41.25403	25.25336	WGS 84		GPS	T. Trilar, M. Gogala	2005-2020	7.7.2018	recorded				MachineObservation
Other material	TGG-004	M. Gogala, T. Trilar, I. Gjonov						Cicada orni	species	Europe	Bulgaria	BG	Kardzhali	Kirkovo	Shumnatitsa, Giumurdzhiyski Snezhnik	622	41.26487	25.35467	WGS 84		GPS	T. Trilar, M. Gogala	2005-2020	29.6.2019	recorded				MachineObservation
Other material	TGG-009	M. Gogala, T. Trilar, I. Gjonov						Cicada orni	species	Europe	Bulgaria	BG	Kardzhali	Kirkovo	Shumnatitsa, Giumurdzhiyski Snezhnik	694	41.26709	25.35265	WGS 84		GPS	T. Trilar, M. Gogala	2005-2020	29.6.2019	recorded				MachineObservation
Other material	TGG-012	M. Gogala, T. Trilar, I. Gjonov, K. Prosenc Trilar						Cicada orni	species	Europe	Bulgaria	BG	Kardzhali	Kirkovo	Pass Makaza, the slope above the pass	909	41.27655	25.43014	WGS 84		GPS	T. Trilar, M. Gogala	2005-2020	10.7.2018	song heard, observed 1F				HumanObservation
Other material	TGG-018	M. Gogala, T. Trilar, I. Gjonov						Cicada orni	species	Europe	Bulgaria	BG	Kardzhali	Kirkovo	Shumnatitsa, Giumurdzhiyski Snezhnik	670	41.27842	25.29295	WGS 84		GPS	T. Trilar, M. Gogala	2005-2020	29.6.2019	recorded				MachineObservation
Other material	TGG-021	M. Gogala, T. Trilar, I. Gjonov						Cicada orni	species	Europe	Bulgaria	BG	Kardzhali	Kirkovo	Shumnatitsa, Giumurdzhiyski Snezhnik	479	41.28014	25.36801	WGS 84		GPS	T. Trilar, M. Gogala	2005-2020	29.6.2019	recorded in the background				MachineObservation
Other material	TGG-025	M. Gogala, T. Trilar, I. Gjonov, K. Prosenc Trilar						Cicada orni	species	Europe	Bulgaria	BG	Kardzhali	Krumovgrad	Tsarino	695	41.31182	25.44270	WGS 84		GPS	T. Trilar, M. Gogala	2005-2020	10.7.2018	song heard				HumanObservation
Other material	TGG-028	T. Trilar, I. Gjonov						Cicada orni	species	Europe	Bulgaria	BG	Kardzhali	Krumovgrad	Avren	721	41.31811	25.72677	WGS 84		GPS	T. Trilar, M. Gogala	2005-2020	3.7.2019	recorded				MachineObservation
Other material	TGG-032	M. Gogala, T. Trilar, I. Gjonov, K. Prosenc Trilar						Cicada orni	species	Europe	Bulgaria	BG	Kardzhali	Krumovgrad	Strizhba	729	41.32112	25.45391	WGS 84		GPS	T. Trilar, M. Gogala	2005-2020	10.7.2018	recorded				MachineObservation
Other material	TGG-037	T. Trilar, I. Gjonov						Cicada orni	species	Europe	Bulgaria	BG	Kardzhali	Krumovgrad	Gorni Yurutsi, Mt. Maglenik	831	41.32749	25.93451	WGS 84		GPS	T. Trilar, M. Gogala	2005-2020	4.7.2019	recorded				MachineObservation
Other material	TGG-045	M. Gogala, T. Trilar, I. Gjonov, K. Prosenc Trilar		1	Female		PMSL	Cicada orni	species	Europe	Bulgaria	BG	Kardzhali	Krumovgrad	Gorni Yurutsi, Mt. Maglenik	781	41.32866	25.93193	WGS 84		GPS	T. Trilar, M. Gogala	2005-2020	8.7.2018			PMSL	PMSL	PreservedSpecimen
Other material	TGG-047	M. Gogala, T. Trilar, I. Gjonov, K. Prosenc Trilar						Cicada orni	species	Europe	Bulgaria	BG	Kardzhali	Krumovgrad	Gorni Yurutsi, Mt. Maglenik	614	41.33755	25.94570	WGS 84		GPS	T. Trilar, M. Gogala	2005-2020	8.7.2018	recorded				MachineObservation
Other material	TGG-051	M. Gogala						Cicada orni	species	Europe	Bulgaria	BG	Kardzhali	Krumovgrad	Chernichevo	560	41.3535	25.75282	WGS 84		GPS	T. Trilar, M. Gogala	2005-2020	5.7.2012	recorded				MachineObservation
Other material	TGG-056	M. Gogala						Cicada orni	species	Europe	Bulgaria	BG	Haskovo	Ivaylovgrad	Dolno Lukovo, Meden Buk	115	41.36972	26.05222	WGS 84		GPS	T. Trilar, M. Gogala	2005-2020	6.7.2012	recorded				MachineObservation
Other material	TGG-059	T. Trilar, I. Gjonov						Cicada orni	species	Europe	Bulgaria	BG	Haskovo	Ivaylovgrad	Meden Buk	152	41.37005	26.05434	WGS 84		GPS	T. Trilar, M. Gogala	2005-2020	6.7.2019	recorded				MachineObservation
Other material	TGG-066	M. Gogala						Cicada orni	species	Europe	Bulgaria	BG	Kardzhali	Krumovgrad	Strazhets, Bjala reka	455	41.37941	25.85044	WGS 84		GPS	T. Trilar, M. Gogala	2005-2020	5.7.2012	recorded				MachineObservation
Other material	TGG-072	M. Gogala, T. Trilar, I. Gjonov, K. Prosenc Trilar						Cicada orni	species	Europe	Bulgaria	BG	Kardzhali	Krumovgrad	Gulia mahala Costia, reka Krumovitsa	251	41.40271	25.67498	WGS 84		GPS	T. Trilar, M. Gogala	2005-2020	10.7.2018	recorded				MachineObservation
Other material	TGG-087	M. Gogala, T. Trilar, I. Gjonov, K. Prosenc Trilar						Cicada orni	species	Europe	Bulgaria	BG	Kardzhali	Krumovgrad	Skalak, Mahala Sinap, reka Kesebir	252	41.41937	25.64322	WGS 84		GPS	T. Trilar, M. Gogala	2005-2020	10.7.2018	recorded				MachineObservation
Other material	TGG-101	M. Gogala, T. Trilar, I. Gjonov						Cicada orni	species	Europe	Bulgaria	BG	Blagoevgrad	Petrich	Levunovo, Rupite	90	41.45901	23.26158	WGS 84		GPS	T. Trilar, M. Gogala	2005-2020	22.7.2008	song heard				HumanObservation
Other material	TGG-104	M. Gogala, I. Gjonov						Cicada orni	species	Europe	Bulgaria	BG	Blagoevgrad	Sandanski	Kalimantsi, Kalimanska reka	370	41.46186	23.51201	WGS 84		GPS	T. Trilar, M. Gogala	2005-2020	23.7.2010	recorded				MachineObservation
Other material	TGG-108	P. Dochev		1	Male	adult	BFUS	Cicada orni	species	Europe	Bulgaria	BG	Blagoevgrad	Sandanski	Kalimantsi	355	41.4658	23.4692	WGS 84	T. Trilar, I. Gjonov, M. Gogala	label	T. Trilar, M. Gogala	2005-2020	4.8.2018			BFUS	BFUS	PreservedSpecimen
Other material	TGG-118	M. Gogala						Cicada orni	species	Europe	Bulgaria	BG	Haskovo	Ivaylovgrad	Svirachi	315	41.47416	26.11001	WGS 84		GPS	T. Trilar, M. Gogala	2005-2020	6.7.2012	recorded				MachineObservation
Other material	TGG-122	I. Gjonov		1	Female	adult	BFUS	Cicada orni	species	Europe	Bulgaria	BG	Blagoevgrad	Sandanski	Zlatolist	394	41.4976	23.4285	WGS 84		GPS	T. Trilar, M. Gogala	2005-2020	2.7.2018			BFUS	BFUS	PreservedSpecimen
Other material	TGG-133							Cicada orni	species	Europe	Bulgaria	BG	Blagoevgrad	Sandanski	Melnik	425	41.524	23.388	WGS 84	T. Trilar, I. Gjonov, M. Gogala	paper			9.8.1981		Sander 1985			LiteratureRecord
Other material	TGG-134							Cicada orni	species	Europe	Bulgaria	BG	Blagoevgrad	Sandanski	Melnik	425	41.524	23.388	WGS 84	T. Trilar, I. Gjonov, M. Gogala	paper			17.8.1982 - 21.8.1982		Sander 1985			LiteratureRecord
Other material	TGG-140	T. Trilar, I. Gjonov						Cicada orni	species	Europe	Bulgaria	BG	Kardzhali	Ardino	Temenuga	843	41.52479	25.17054	WGS 84		GPS	T. Trilar, M. Gogala	2005-2020	3.7.2019	song heard				HumanObservation
Other material	TGG-142	M. Gogala						Cicada orni	species	Europe	Bulgaria	BG	Blagoevgrad	Sandanski	Melnik, Rozhen Monastery	570	41.532606	23.429362	WGS 84		GPS	T. Trilar, M. Gogala	2005-2020	27.6.2012	recorded				MachineObservation
Other material	TGG-153	M. Gogala, T. Trilar, I. Gjonov						Cicada orni	species	Europe	Bulgaria	BG	Kardzhali	Ardino	Ardino, Svetulka	676	41.56826	25.1017	WGS 84		GPS	T. Trilar, M. Gogala	2005-2020	21.6.2009	song heard				HumanObservation
Other material	TGG-155	T. Trilar, I. Gjonov						Cicada orni	species	Europe	Bulgaria	BG	Haskovo	Ivaylovgrad	Huhla	173	41.57555	26.07253	WGS 84		GPS	T. Trilar, M. Gogala	2005-2020	6.7.2019	song heard				HumanObservation
Other material	TGG-162	M. Gogala						Cicada orni	species	Europe	Bulgaria	BG	Kardzhali	Kardzhali	Kyosevo, Boyno	530	41.60251	25.29027	WGS 84		GPS	T. Trilar, M. Gogala	2005-2020	3.7.2012	recorded				MachineObservation
Other material	TGG-172	T. Trilar, I. Gjonov						Cicada orni	species	Europe	Bulgaria	BG	Kardzhali	Kardzhali	Topolchane	421	41.61805	25.32474	WGS 84		GPS	T. Trilar, M. Gogala	2005-2020	2.7.2019	song heard				HumanObservation
Other material	TGG-189	M. Gogala, T. Trilar, I. Gjonov, K. Prosenc Trilar						Cicada orni	species	Europe	Bulgaria	BG	Haskovo	Lyubimets	Valche pole, Sheynovec Mt.	681	41.71525	26.02861	WGS 84		GPS	T. Trilar, M. Gogala	2005-2020	9.7.2018	song heard				HumanObservation
Other material	TGG-195	M. Gogala, T. Trilar, I. Gjonov, K. Prosenc Trilar						Cicada orni	species	Europe	Bulgaria	BG	Haskovo	Lyubimets	Mezek, Sheynovec Mt.	370	41.72536	26.06893	WGS 84		GPS	T. Trilar, M. Gogala	2005-2020	9.7.2018	song heard				HumanObservation
Other material	TGG-210	M. Gogala, T. Trilar, I. Gjonov, K. Prosenc Trilar						Cicada orni	species	Europe	Bulgaria	BG	Haskovo	Lyubimets	Malko Gradishte, Gorata	290	41.75423	25.98328	WGS 84		GPS	T. Trilar, M. Gogala	2005-2020	6.7.2018	song heard				HumanObservation
Other material	TGG-221	M. Gogala, T. Trilar, I. Gjonov, K. Prosenc Trilar						Cicada orni	species	Europe	Bulgaria	BG	Haskovo	Lyubimets	Malko Gradishte, Gorata	289	41.75423	25.98339	WGS 84		GPS	T. Trilar, M. Gogala	2005-2020	11.7.2018	song heard				HumanObservation
Other material	TGG-228	M. Gogala						Cicada orni	species	Europe	Bulgaria	BG	Blagoevgrad	Kresna	Kresna, Kresna Gorge	205	41.76027	23.15472	WGS 84		GPS	T. Trilar, M. Gogala	2005-2020	29.6.2012	recorded				MachineObservation
Other material	TGG-232	P. Drenski		2	Male	adult	SOFM	Cicada orni	species	Europe	Bulgaria	BG	Blagoevgrad	Kresna	Kresna gorge	203	41.7621	23.155	WGS 84	T. Trilar, I. Gjonov, M. Gogala	label	T. Trilar, M. Gogala	2005-2020	3.7.1937			SOFM	SOFM	PreservedSpecimen
Other material	TGG-233	P. Drenski		1	Female	adult	SOFM	Cicada orni	species	Europe	Bulgaria	BG	Blagoevgrad	Kresna	Kresna gorge	203	41.7621	23.155	WGS 84	T. Trilar, I. Gjonov, M. Gogala	label	T. Trilar, M. Gogala	2005-2020	3.7.1937			SOFM	SOFM	PreservedSpecimen
Other material	TGG-243	no legit data		1	Male	adult	SOFM	Cicada orni	species	Europe	Bulgaria	BG	Blagoevgrad	Simitli	Krupnik	335	41.851	23.116	WGS 84	T. Trilar, I. Gjonov, M. Gogala	label	T. Trilar, M. Gogala	2005-2020	5.7.1917			SOFM	SOFM	PreservedSpecimen
Other material	TGG-250							Cicada orni	species	Europe	Bulgaria	BG	Plovdiv	Asenovgrad	Bachkovo Monastery	400	41.942	24.849	WGS 84	T. Trilar, I. Gjonov, M. Gogala	paper					Nedyalkov 1908 as Tettigia orni Lin.			LiteratureRecord
Other material	TGG-251	M. Gogala, T. Trilar, I. Gjonov						Cicada orni	species	Europe	Bulgaria	BG	Plovdiv	Asenovgrad	Bachkovo Monastery	384	41.94429	24.85661	WGS 84		GPS	T. Trilar, M. Gogala	2005-2020	21.6.2016	song heard				HumanObservation
Other material	TGG-290	L. Stoyanova		1	Male	adult	SOFM	Cicada orni	species	Europe	Bulgaria	BG	Plovdiv	Asenovgrad	Asenovgrad	230	42.011	24.878	WGS 84	T. Trilar, I. Gjonov, M. Gogala	label	T. Trilar, M. Gogala	2005-2020	3.7.1954			SOFM	SOFM	PreservedSpecimen
Other material	TGG-291	V. Martino		3	Male	adult	SOFM	Cicada orni	species	Europe	Bulgaria	BG	Plovdiv	Asenovgrad	Asenovgrad	230	42.011	24.878	WGS 84	T. Trilar, I. Gjonov, M. Gogala	label	T. Trilar, M. Gogala	2005-2020	14.7.1954			SOFM	SOFM	PreservedSpecimen
Other material	TGG-292	V. Martino		1	Female	adult	SOFM	Cicada orni	species	Europe	Bulgaria	BG	Plovdiv	Asenovgrad	Asenovgrad	230	42.011	24.878	WGS 84	T. Trilar, I. Gjonov, M. Gogala	label	T. Trilar, M. Gogala	2005-2020	14.7.1954			SOFM	SOFM	PreservedSpecimen
Other material	TGG-293							Cicada orni	species	Europe	Bulgaria	BG	Plovdiv	Asenovgrad	Asenovgrad	230	42.011	24.878	WGS 84	T. Trilar, I. Gjonov, M. Gogala	paper					Nedyalkov 1908 as Tettigia orni Lin.			LiteratureRecord
Other material	TGG-299	M. Gogala, T. Trilar, I. Gjonov						Cicada orni	species	Europe	Bulgaria	BG	Burgas	Tsarevo	Rezovo, Silistar	32	42.02597	28.01335	WGS 84		GPS	T. Trilar, M. Gogala	2005-2020	23.6.2009	song heard				HumanObservation
Other material	TGG-305	M. Gogala, T. Trilar, I. Gjonov						Cicada orni	species	Europe	Bulgaria	BG	Burgas	Malko Tarnovo	Stoilovo, reka Mechi Dol, natural reserve Sredoka	219	42.02697	27.51966	WGS 84		GPS	T. Trilar, M. Gogala	2005-2020	22.6.2009	recorded in the backgound				MachineObservation
Other material	TGG-326	M. Gogala, T. Trilar, I. Gjonov						Cicada orni	species	Europe	Bulgaria	BG	Burgas	Tsarevo	Sinemorets, estuary of Veleka reka	5	42.06432	27.97039	WGS 84		GPS	T. Trilar, M. Gogala	2005-2020	23.6.2009	song heard				HumanObservation
Other material	TGG-336	M. Gogala, T. Trilar, I. Gjonov						Cicada orni	species	Europe	Bulgaria	BG	Burgas	Malko Tarnovo	Zvezdets, 1.5 km SE	332	42.10523	27.4339	WGS 84		GPS	T. Trilar, M. Gogala	2005-2020	22.6.2009	song heard				HumanObservation
Other material	TGG-362	M. Gogala, T. Trilar, I. Gjonov						Cicada orni	species	Europe	Bulgaria	BG	Burgas	Malko Tarnovo	Zvezdets, Petrova Niva	171	42.13934	27.4465	WGS 84		GPS	T. Trilar, M. Gogala	2005-2020	22.6.2009	song heard				HumanObservation
Other material	TGG-378	M. Gogala, T. Trilar, I. Gjonov						Cicada orni	species	Europe	Bulgaria	BG	Burgas	Malko Tarnovo	Mladezhko, spring of Mladezhka reka	212	42.15169	27.36178	WGS 84		GPS	T. Trilar, M. Gogala	2005-2020	24.6.2009	song heard				HumanObservation
Other material	TGG-391	M. Gogala, T. Trilar, I. Gjonov						Cicada orni	species	Europe	Bulgaria	BG	Kyustendil	Boboshevo	Boboshevo	730	42.16394	22.97905	WGS 84		GPS	T. Trilar, M. Gogala	2005-2020	22.7.2008	song heard				HumanObservation
Other material	TGG-396	I. Gjonov						Cicada orni	species	Europe	Bulgaria	BG	Burgas	Tsarevo	Fazanovo, Popovi skali	50	42.16472	27.73417	WGS 84		GPS	I. Gjonov	2005-2020	27.6.2011	recorded				MachineObservation
Other material	TGG-404							Cicada orni	species	Europe	Bulgaria	BG	Pazardzhik	Pazardzhik	Pazardzhik	210	42.192	24.333	WGS 84	T. Trilar, I. Gjonov, M. Gogala	paper					Nedyalkov 1908 as Tettigia orni Lin.			LiteratureRecord
Other material	TGG-434	Totev		1	Female	adult	SOFM	Cicada orni	species	Europe	Bulgaria	BG	Burgas	Primorsko	Primorsko, Ropotamo Nature Reserve	13	42.301	27.729	WGS 84	T. Trilar, I. Gjonov, M. Gogala	label	T. Trilar, M. Gogala	2005-2020	2.7.1947 - 3.7.1947			SOFM	SOFM	PreservedSpecimen
Other material	TGG-437	M. Josifov		8	Male	adult	SOFM	Cicada orni	species	Europe	Bulgaria	BG	Burgas	Primorsko	Primorsko, Maslen nos	22	42.309	27.785	WGS 84	T. Trilar, I. Gjonov, M. Gogala	label	T. Trilar, M. Gogala	2005-2020	15.7.1955			SOFM	SOFM	PreservedSpecimen
Other material	TGG-438	M. Josifov		4	Female	adult	SOFM	Cicada orni	species	Europe	Bulgaria	BG	Burgas	Primorsko	Primorsko, Maslen nos	22	42.309	27.785	WGS 84	T. Trilar, I. Gjonov, M. Gogala	label	T. Trilar, M. Gogala	2005-2020	15.7.1955			SOFM	SOFM	PreservedSpecimen
Other material	TGG-441	M. Gogala, T. Trilar, I. Gjonov						Cicada orni	species	Europe	Bulgaria	BG	Burgas	Primorsko	Primorsko, Maslen nos	22	42.30988	27.78541	WGS 84		GPS	T. Trilar, M. Gogala	2005-2020	23.6.2009	song heard				HumanObservation
Other material	TGG-462	I. Gjonov						Cicada orni	species	Europe	Bulgaria	BG	Kyustendil	Kyustendil	Razhdavitsa	500	42.39611	22.70611	WGS 84		GPS	I. Gjonov	2005-2020	13.7.2011	recorded				MachineObservation
Other material	TGG-482	D. Gradinov, Y. Petrova		2	Male	adult	BFUS	Cicada orni	species	Europe	Bulgaria	BG	Pernik	Zemen	near the tunnel II	590	42.452262	22.711197	WGS 84	T. Trilar, I. Gjonov, M. Gogala	label	T. Trilar, M. Gogala	2005-2020	16.7.2006			BFUS	BFUS	PreservedSpecimen
Other material	TGG-494							Cicada orni	species	Europe	Bulgaria	BG	Stara Zagora	Pavel Banya	Turia	445	42.572	25.186	WGS 84	T. Trilar, I. Gjonov, M. Gogala	paper			1.7.1904 - 30.8.1904		Yoakimov 1909 as Tettigia orni Lin.			LiteratureRecord
Other material	TGG-506	M. Josifov		1	Male	adult	SOFM	Cicada orni	species	Europe	Bulgaria	BG	Stara Zagora	Kazanlak	Kazanlak	375	42.619	25.392	WGS 84	T. Trilar, I. Gjonov, M. Gogala	label	T. Trilar, M. Gogala	2005-2020	30.8.1953			SOFM	SOFM	PreservedSpecimen
Other material	TGG-507	M. Josifov		1	Female	adult	SOFM	Cicada orni	species	Europe	Bulgaria	BG	Stara Zagora	Kazanlak	Kazanlak	375	42.619	25.392	WGS 84	T. Trilar, I. Gjonov, M. Gogala	label	T. Trilar, M. Gogala	2005-2020	30.8.1953			SOFM	SOFM	PreservedSpecimen
Other material	TGG-517	T. Trilar, I. Gjonov						Cicada orni	species	Europe	Bulgaria	BG	Sliven	Sliven	Sliven, Hamambair park	318	42.67104	26.31901	WGS 84		GPS	T. Trilar, M. Gogala	2005-2020	7.7.2019	recorded				MachineObservation
Other material	TGG-523	T. Trilar, I. Gjonov						Cicada orni	species	Europe	Bulgaria	BG	Sliven	Sliven	Sliven, Mladost	286	42.67513	26.34470	WGS 84		GPS	T. Trilar, M. Gogala	2005-2020	6.7.2019	recorded				MachineObservation
Other material	TGG-534							Cicada orni	species	Europe	Bulgaria	BG	Sliven	Sliven	Sliven	265	42.681	26.322	WGS 84	T. Trilar, I. Gjonov, M. Gogala	paper					Nedyalkov 1908 as Tettigia orni Lin.			LiteratureRecord
Other material	TGG-536	T. Trilar, I. Gjonov						Cicada orni	species	Europe	Bulgaria	BG	Sliven	Sliven	Sliven, Komluka, slope	483	42.69007	26.30837	WGS 84		GPS	T. Trilar, M. Gogala	2005-2020	7.7.2019	recorded				MachineObservation
Other material	TGG-544	T. Trilar, I. Gjonov						Cicada orni	species	Europe	Bulgaria	BG	Sliven	Sliven	Sliven, lower cablecar station to Karandila	404	42.70182	26.34990	WGS 84		GPS	T. Trilar, M. Gogala	2005-2020	7.7.2019	recorded in the backgound				MachineObservation
Other material	TGG-551	T. Trilar, I. Gjonov						Cicada orni	species	Europe	Bulgaria	BG	Sliven	Sliven	Sliven, Predela, gorge under the dam of lake Asenovets	386	42.71185	26.26145	WGS 84		GPS	T. Trilar, M. Gogala	2005-2020	7.7.2019	recorded				MachineObservation
Other material	TGG-566	M. Gogala, T. Trilar, I. Gjonov						Cicada orni	species	Europe	Bulgaria	BG	Sliven	Sliven	Karandila, Sotirya	498	42.72441	26.41114	WGS 84		GPS	T. Trilar, M. Gogala	2005-2020	22.6.2016	recorded				MachineObservation
Other material	TGG-594	M. Gogala, T. Trilar, I. Gjonov						Cicada orni	species	Europe	Bulgaria	BG	Varna	Byala	Banya	290	42.77128	27.79341	WGS 84		GPS	T. Trilar, M. Gogala	2005-2020	23.6.2016	song heard				HumanObservation
Other material	TGG-625	M. Gogala, T. Trilar, I. Gjonov, K. Prosenc Trilar						Cicada orni	species	Europe	Bulgaria	BG	Burgas	Ruen	Dobromir	110	42.93577	27.28083	WGS 84		GPS	T. Trilar, M. Gogala	2005-2020	5.7.2018	song heard				HumanObservation
Other material	TGG-641	I. Gjonov						Cicada orni	species	Europe	Bulgaria	BG	Varna	Dolni Chiflik	Goren Chiflik	102	42.98139	27.58056	WGS 84		GPS	I. Gjonov	2005-2020	25.7.2011	recorded				MachineObservation
Other material	TGG-648	I. Gjonov						Cicada orni	species	Europe	Bulgaria	BG	Sofia	Dragoman	Berende izvor, Nishava river	495	42.99194	22.91556	WGS 84		GPS	I. Gjonov	2005-2020	10.7.2011	recorded				MachineObservation
Other material	TGG-663	I. A. Ivanov		3	Male	adult	SOFM	Cicada orni	species	Europe	Bulgaria	BG	Sofia	Svoge	Stara Planina, Iskar gorge, Gara Lakatnik	380	43.079	23.374	WGS 84	T. Trilar, I. Gjonov, M. Gogala	label	T. Trilar, M. Gogala	2005-2020	11.7.1948			SOFM	SOFM	PreservedSpecimen
Other material	TGG-664	I. A. Ivanov		1	Female	adult	SOFM	Cicada orni	species	Europe	Bulgaria	BG	Sofia	Svoge	Stara Planina, Iskar gorge, Gara Lakatnik	380	43.079	23.374	WGS 84	T. Trilar, I. Gjonov, M. Gogala	label	T. Trilar, M. Gogala	2005-2020	11.7.1948			SOFM	SOFM	PreservedSpecimen
Other material	TGG-676	no legit data		1		exuvium	SOFM	Cicada orni	species	Europe	Bulgaria	BG	Shumen	Veliki Preslav	Patlejna reserve	200	43.134	26.818	WGS 84	T. Trilar, I. Gjonov, M. Gogala	label	T. Trilar, M. Gogala	2005-2020	21.5.1928			SOFM	SOFM	PreservedSpecimen
Other material	TGG-680	I. Buresch		1	Male	adult	SOFM	Cicada orni	species	Europe	Bulgaria	BG	Lovech	Lukovit	Karlukovo	260	43.166	24.067	WGS 84	T. Trilar, I. Gjonov, M. Gogala	label	T. Trilar, M. Gogala	2005-2020	18.7.1948			SOFM	SOFM	PreservedSpecimen
Other material	TGG-684	M. Gogala, T. Trilar, I. Gjonov						Cicada orni	species	Europe	Bulgaria	BG	Lovech	Lukovit	Karlukovo, Prohodna cave	234	43.1748	24.07471	WGS 84		GPS	T. Trilar, M. Gogala	2005-2020	16.6.2009	song heard				HumanObservation
Other material	TGG-695	M. Gogala, T. Trilar, I. Gjonov, K. Prosenc Trilar						Cicada orni	species	Europe	Bulgaria	BG	Targovishte	Targovishte	Targovishte, Prolaz	274	43.19843	26.50878	WGS 84		GPS	T. Trilar, M. Gogala	2005-2020	1.7.2018	song heard				HumanObservation
Other material	TGG-724	Dr. Iw. Buresh		2	Male	adult	SOFM	Cicada orni	species	Europe	Bulgaria	BG	Varna	Varna	Varna, Evxinograd	55	43.219	27.994	WGS 84	T. Trilar, I. Gjonov, M. Gogala	label	T. Trilar, M. Gogala	2005-2020	3.8.1935			SOFM	SOFM	PreservedSpecimen
Other material	TGG-725	Dr. Iw. Buresh		1	Female	adult	SOFM	Cicada orni	species	Europe	Bulgaria	BG	Varna	Varna	Varna, Evxinograd	55	43.219	27.994	WGS 84	T. Trilar, I. Gjonov, M. Gogala	label	T. Trilar, M. Gogala	2005-2020	3.8.1935			SOFM	SOFM	PreservedSpecimen
