# Supplementary material for: Checklist and provisional atlas of singing cicadas (Hemiptera: Cicadidae) of Bulgaria, based on bioacoustics
Source: Biodivers Data J. 2020 Oct 9;8:e54424. doi: 10.3897/BDJ.8.e54424 (PMC7567745; doi:10.3897/BDJ.8.e54424)
Supplement: Supplementary material 4 — Cicadatra hyalina faunistic data. Checklist and provisional atlas of singing cicadas (Hemiptera: Cicadidae) of Bulgaria, based on bioacoustics [file bdj-08-e54424-s004.csv]

typeStatus	catalogNumber	recordedBy	individualID	individualCount	sex	lifeStage	disposition	scientificName	taxonRank	continent	country	countryCode	stateProvince	municipality	locality	minimumElevationInMeters	decimalLatitude	decimalLongitude	geodeticDatum	georeferencedBy	georeferenceProtocol	identifiedBy	dateIdentified	eventDate	fieldNotes	bibliographicCitation	institutionCode	collectionCode	basisOfRecord
Other material	TGG-112	I. Gjonov		1	Female	adult	BFUS	Cicadatra hyalina	species	Europe	Bulgaria	BG	Blagoevgrad	Sandanski	Harsovo	260	41.4689	23.3922	WGS 84		GPS	T. Trilar, M. Gogala	2005-2020	3.7.2017			BFUS	BFUS	PreservedSpecimen
Other material	TGG-769	I. Gjonov, M. Gogala, T. Trilar		1	Male	adult	BFUS	Cicadatra hyalina	species	Europe	Bulgaria	BG	Dobrich	Kavarna	Balgarevo, Kaliakra cape	60	43.38137	28.45804	WGS 84		GPS	T. Trilar, M. Gogala	2005-2020	25.6.2016			BFUS	BFUS	PreservedSpecimen
Other material	TGG-770	I. Gjonov, M. Gogala, T. Trilar						Cicadatra hyalina	species	Europe	Bulgaria	BG	Dobrich	Kavarna	Balgarevo, Kaliakra cape	60	43.38137	28.45804	WGS 84		GPS	T. Trilar, M. Gogala	2005-2020	25.6.2016	recorded				MachineObservation
Other material	TGG-780	M. Gogala, T. Trilar, I. Gjonov		1	Male	adult	PMSL	Cicadatra hyalina	species	Europe	Bulgaria	BG	Dobrich	Kavarna	Balgarevo, Kaliakra cape	66	43.38361	28.45478	WGS 84		GPS	T. Trilar, M. Gogala	2005-2020	25.6.2016			PMSL	PMSL	PreservedSpecimen
Other material	TGG-781	M. Gogala, T. Trilar, I. Gjonov						Cicadatra hyalina	species	Europe	Bulgaria	BG	Dobrich	Kavarna	Balgarevo, Kaliakra cape	66	43.38361	28.45478	WGS 84		GPS	T. Trilar, M. Gogala	2005-2020	25.6.2016	recorded				MachineObservation
Other material	TGG-785	M. Gogala, T. Trilar, I. Gjonov						Cicadatra hyalina	species	Europe	Bulgaria	BG	Dobrich	Kavarna	Balgarevo, Kaliakra cape	61	43.38645	28.45287	WGS 84		GPS	T. Trilar, M. Gogala	2005-2020	24.6.2016	recorded				MachineObservation
Other material	TGG-792	M. Gogala, T. Trilar, I. Gjonov		2	Male	adult	PMSL	Cicadatra hyalina	species	Europe	Bulgaria	BG	Dobrich	Kavarna	Balgarevo, Kaliakra cape	68	43.39188	28.45619	WGS 84		GPS	T. Trilar, M. Gogala	2005-2020	25.6.2016			PMSL	PMSL	PreservedSpecimen
Other material	TGG-793	M. Gogala, T. Trilar, I. Gjonov		2	Female	adult	PMSL	Cicadatra hyalina	species	Europe	Bulgaria	BG	Dobrich	Kavarna	Balgarevo, Kaliakra cape	68	43.39188	28.45619	WGS 84		GPS	T. Trilar, M. Gogala	2005-2020	25.6.2016			PMSL	PMSL	PreservedSpecimen
Other material	TGG-794	M. Gogala, T. Trilar, I. Gjonov						Cicadatra hyalina	species	Europe	Bulgaria	BG	Dobrich	Kavarna	Balgarevo, Kaliakra cape	68	43.39188	28.45619	WGS 84		GPS	T. Trilar, M. Gogala	2005-2020	25.6.2016	recorded				MachineObservation
