# Supplementary material for: Checklist and provisional atlas of singing cicadas (Hemiptera: Cicadidae) of Bulgaria, based on bioacoustics
Source: Biodivers Data J. 2020 Oct 9;8:e54424. doi: 10.3897/BDJ.8.e54424 (PMC7567745; doi:10.3897/BDJ.8.e54424)
Supplement: Supplementary material 6 — Cicadatra platyptera faunistic data. Checklist and provisional atlas of singing cicadas (Hemiptera: Cicadidae) of Bulgaria, based on bioacoustics [file bdj-08-e54424-s006.csv]

typeStatus	catalogNumber	recordedBy	individualID	individualCount	sex	lifeStage	disposition	scientificName	taxonRank	continent	country	countryCode	stateProvince	municipality	locality	minimumElevationInMeters	decimalLatitude	decimalLongitude	geodeticDatum	georeferencedBy	georeferenceProtocol	identifiedBy	dateIdentified	eventDate	fieldNotes	bibliographicCitation	institutionCode	collectionCode	basisOfRecord
Other material	TGG-343	M. Gogala, T. Trilar, I. Gjonov		6	Male	adult	PMSL	Cicadatra platyptera	species	Europe	Bulgaria	BG	Plovdiv	Sadovo	Popovitsa, Ahmatovo	181	42.11513	25.05807	WGS 84		GPS	T. Trilar, M. Gogala	2005-2020	21.6.2016			PMSL	PMSL	PreservedSpecimen
Other material	TGG-344	M. Gogala, T. Trilar, I. Gjonov		1	Male	adult	BFUS	Cicadatra platyptera	species	Europe	Bulgaria	BG	Plovdiv	Sadovo	Popovitsa, Ahmatovo	181	42.11513	25.05807	WGS 84		GPS	T. Trilar, M. Gogala	2005-2020	21.6.2016			BFUS	BFUS	PreservedSpecimen
Other material	TGG-345	M. Gogala, T. Trilar, I. Gjonov						Cicadatra platyptera	species	Europe	Bulgaria	BG	Plovdiv	Sadovo	Popovitsa, Ahmatovo	181	42.11513	25.05807	WGS 84		GPS	T. Trilar, M. Gogala	2005-2020	21.6.2016	recorded				MachineObservation
Other material	TGG-349	M. Gogala, I. Gjonov						Cicadatra platyptera	species	Europe	Bulgaria	BG	Plovdiv	Sadovo	Popovitsa, Ahmatovo	167	42.11585	25.0506	WGS 84		GPS	T. Trilar, M. Gogala	2005-2020	24.7.2010	recorded				MachineObservation
Other material	TGG-350	M. Gogala		5	Male	adult	PMSL	Cicadatra platyptera	species	Europe	Bulgaria	BG	Plovdiv	Sadovo	Popovitsa, Ahmatovo	160	42.11777	25.05556	WGS 84		GPS	T. Trilar, M. Gogala	2005-2020	7.7.2012			PMSL	PMSL	PreservedSpecimen
Other material	TGG-351	M. Gogala		2	Female	adult	PMSL	Cicadatra platyptera	species	Europe	Bulgaria	BG	Plovdiv	Sadovo	Popovitsa, Ahmatovo	160	42.11777	25.05556	WGS 84		GPS	T. Trilar, M. Gogala	2005-2020	7.7.2012			PMSL	PMSL	PreservedSpecimen
Other material	TGG-352	M. Gogala						Cicadatra platyptera	species	Europe	Bulgaria	BG	Plovdiv	Sadovo	Popovitsa, Ahmatovo	160	42.11777	25.05556	WGS 84		GPS	T. Trilar, M. Gogala	2005-2020	7.7.2012	recorded				MachineObservation
Other material	TGG-356	I. Gjonov		1	Male	adult	BFUS	Cicadatra platyptera	species	Europe	Bulgaria	BG	Plovdiv	Stamboliyski	Besaparski hills	194	42.131904	24.456831	WGS 84		GPS	T. Trilar, M. Gogala	2005-2020	4.7.2017			BFUS	BFUS	PreservedSpecimen
Other material	TGG-448	I. Gjonov		4	Male	adult	BFUS	Cicadatra platyptera	species	Europe	Bulgaria	BG	Yambol	Tundzha	Tenevo	122	42.3361	26.5780	WGS 84		GPS	T. Trilar, M. Gogala	2005-2020	11.7.2016			BFUS	BFUS	PreservedSpecimen
Other material	TGG-771	M. Gogala, T. Trilar, I. Gjonov		4	Male	adult	PMSL	Cicadatra platyptera	species	Europe	Bulgaria	BG	Dobrich	Kavarna	Balgarevo, Kaliakra cape	60	43.38137	28.45804	WGS 84		GPS	T. Trilar, M. Gogala	2005-2020	25.6.2016			PMSL	PMSL	PreservedSpecimen
Other material	TGG-772	M. Gogala, T. Trilar, I. Gjonov		1	Female	adult	PMSL	Cicadatra platyptera	species	Europe	Bulgaria	BG	Dobrich	Kavarna	Balgarevo, Kaliakra cape	60	43.38137	28.45804	WGS 84		GPS	T. Trilar, M. Gogala	2005-2020	25.6.2016			PMSL	PMSL	PreservedSpecimen
Other material	TGG-773	M. Gogala, T. Trilar, I. Gjonov		20	Male	adult	BFUS	Cicadatra platyptera	species	Europe	Bulgaria	BG	Dobrich	Kavarna	Balgarevo, Kaliakra cape	60	43.38137	28.45804	WGS 84		GPS	T. Trilar, M. Gogala	2005-2020	25.6.2016			BFUS	BFUS	PreservedSpecimen
Other material	TGG-774	M. Gogala, T. Trilar, I. Gjonov						Cicadatra platyptera	species	Europe	Bulgaria	BG	Dobrich	Kavarna	Balgarevo, Kaliakra cape	60	43.38137	28.45804	WGS 84		GPS	T. Trilar, M. Gogala	2005-2020	25.6.2016	recorded				MachineObservation
Other material	TGG-832	M. Gogala, T. Trilar, I. Gjonov, K. Prosenc Trilar		2	Male	adult	PMSL	Cicadatra platyptera	species	Europe	Bulgaria	BG	Dobrich	Kavarna	Shabla, Vidno	100	43.54360	28.37625	WGS 84		GPS	T. Trilar, M. Gogala	2005-2020	2.7.2018			PMSL	PMSL	PreservedSpecimen
Other material	TGG-833	M. Gogala, T. Trilar, I. Gjonov, K. Prosenc Trilar						Cicadatra platyptera	species	Europe	Bulgaria	BG	Dobrich	Kavarna	Shabla, Vidno	100	43.54360	28.37625	WGS 84		GPS	T. Trilar, M. Gogala	2005-2020	2.7.2018	recorded				MachineObservation
Other material	TGG-837	M. Gogala, T. Trilar, I. Gjonov, K. Prosenc Trilar						Cicadatra platyptera	species	Europe	Bulgaria	BG	Dobrich	Kavarna	Shabla, Neykovo	78	43.59126	28.41014	WGS 84		GPS	T. Trilar, M. Gogala	2005-2020	2.7.2018	recorded				MachineObservation
Other material	TGG-840	M. Gogala, T. Trilar, I. Gjonov, K. Prosenc Trilar		1	Male	adult	PMSL	Cicadatra platyptera	species	Europe	Bulgaria	BG	Dobrich	Kavarna	Shabla, Neykovo	78	43.60001	28.41852	WGS 84		GPS	T. Trilar, M. Gogala	2005-2020	2.7.2018			PMSL	PMSL	PreservedSpecimen
Other material	TGG-841	M. Gogala, T. Trilar, I. Gjonov, K. Prosenc Trilar		3	Female	adult	PMSL	Cicadatra platyptera	species	Europe	Bulgaria	BG	Dobrich	Kavarna	Shabla, Neykovo	78	43.60001	28.41852	WGS 84		GPS	T. Trilar, M. Gogala	2005-2020	2.7.2018			PMSL	PMSL	PreservedSpecimen
Other material	TGG-842	M. Gogala, T. Trilar, I. Gjonov, K. Prosenc Trilar						Cicadatra platyptera	species	Europe	Bulgaria	BG	Dobrich	Kavarna	Shabla, Neykovo	78	43.60001	28.41852	WGS 84		GPS	T. Trilar, M. Gogala	2005-2020	2.7.2018	recorded				MachineObservation
Other material	TGG-853	N. Karnoschitzky		1	Female	adult	SOFM	Cicadatra platyptera	species	Europe	Bulgaria	BG	Dobrich	General Toshevo	Yovkovo	165	43.781	28.138	WGS 84		label	T. Trilar, M. Gogala	2005-2020	22.6.1946			SOFM	SOFM	PreservedSpecimen
