# Supplementary material for: Checklist and provisional atlas of singing cicadas (Hemiptera: Cicadidae) of Bulgaria, based on bioacoustics
Source: Biodivers Data J. 2020 Oct 9;8:e54424. doi: 10.3897/BDJ.8.e54424 (PMC7567745; doi:10.3897/BDJ.8.e54424)
Supplement: Supplementary material 8 — Cicadetta montana s. str. faunistic data. Checklist and provisional atlas of singing cicadas (Hemiptera: Cicadidae) of Bulgaria, based on bioacoustics [file bdj-08-e54424-s008.csv]

typeStatus	catalogNumber	recordedBy	individualID	individualCount	sex	lifeStage	disposition	scientificName	taxonRank	continent	country	countryCode	stateProvince	municipality	locality	minimumElevationInMeters	decimalLatitude	decimalLongitude	geodeticDatum	georeferencedBy	georeferenceProtocol	identifiedBy	dateIdentified	eventDate	fieldNotes	bibliographicCitation	institutionCode	collectionCode	basisOfRecord
Other material	TGG-357	M. Gogala						Cicadetta montana s. str.	species	Europe	Bulgaria	BG	Kyustendil	Rila	Rila Monastery	1125	42.13261	23.34163	WGS 84		GPS	T. Trilar, M. Gogala	2005-2020	30.6.2012	recorded				MachineObservation
Other material	TGG-410	I. Gjonov						Cicadetta montana s. str.	species	Europe	Bulgaria	BG	Kyustendil	Nevestino	Ranentsi	1258	42.21444	22.54750	WGS 84		GPS	I. Gjonov	2005-2020	15.7.2011	recorded				MachineObservation
Other material	TGG-449	I. Gjonov						Cicadetta montana s. str.	species	Europe	Bulgaria	BG	Kyustendil	Kyustendil	Tsarvenjano under Radomir peak	1168	42.36500	22.82750	WGS 84		GPS	I. Gjonov	2005-2020	5.6.2011	recorded				MachineObservation
Other material	TGG-476	M. Gogala, T. Trilar, I. Gjonov, K. Prosenc Trilar						Cicadetta montana s. str.	species	Europe	Bulgaria	BG	Sofia	Ihtiman	Ihtiman	836	42.43891	23.85898	WGS 84		GPS	T. Trilar, M. Gogala	2005-2020	11.7.2018	recorded				MachineObservation
Other material	TGG-479	M. Gogala, T. Trilar, I. Gjonov, K. Prosenc Trilar						Cicadetta montana s. str.	species	Europe	Bulgaria	BG	Sofia	Ihtiman	Ihtiman	907	42.44709	23.86418	WGS 84		GPS	T. Trilar, M. Gogala	2005-2020	11.7.2018	recorded				MachineObservation
Other material	TGG-485	M. Gogala, T. Trilar, I. Gjonov						Cicadetta montana s. str.	species	Europe	Bulgaria	BG	Plovdiv	Brezovo	Rozovets	973	42.48409	25.17775	WGS 84		GPS	T. Trilar, M. Gogala	2005-2020	28.6.2016	recorded				MachineObservation
Other material	TGG-486	M. Gogala, T. Trilar, I. Gjonov						Cicadetta montana s. str.	species	Europe	Bulgaria	BG	Plovdiv	Brezovo	Rozovets	1036	42.48997	25.17618	WGS 84		GPS	T. Trilar, M. Gogala	2005-2020	28.6.2016	recorded				MachineObservation
Other material	TGG-489	M. Gogala, T. Trilar, I. Gjonov						Cicadetta montana s. str.	species	Europe	Bulgaria	BG	Plovdiv	Brezovo	Bratan	1212	42.50493	25.15277	WGS 84		GPS	T. Trilar, M. Gogala	2005-2020	28.6.2016	recorded				MachineObservation
Other material	TGG-490	M. Gogala, T. Trilar, I. Gjonov, K. Prosenc Trilar						Cicadetta montana s. str.	species	Europe	Bulgaria	BG	Sofia	Ichtiman	Ihtimanska Sredna Gora	1062	42.54127	23.80908	WGS 84		GPS	T. Trilar, M. Gogala	2005-2020	11.7.2018	recorded				MachineObservation
Other material	TGG-556	M. Gogala, T. Trilar, I. Gjonov						Cicadetta montana s. str.	species	Europe	Bulgaria	BG	Sliven	Sliven	Karandila, upper lift station	982	42.71803	26.36090	WGS 84		GPS	T. Trilar, M. Gogala	2005-2020	22.6.2016	recorded				MachineObservation
Other material	TGG-559	M. Gogala, T. Trilar, I. Gjonov						Cicadetta montana s. str.	species	Europe	Bulgaria	BG	Sliven	Sliven	Karandila, Sinite kamni	1036	42.72112	26.36270	WGS 84		GPS	T. Trilar, M. Gogala	2005-2020	22.6.2016	recorded				MachineObservation
Other material	TGG-561	M. Gogala, T. Trilar, I. Gjonov						Cicadetta montana s. str.	species	Europe	Bulgaria	BG	Sliven	Sliven	Karandila, Sotirya	480	42.72360	26.41006	WGS 84		GPS	T. Trilar, M. Gogala	2005-2020	21.6.2016	recorded				MachineObservation
Other material	TGG-567	M. Gogala, T. Trilar, I. Gjonov						Cicadetta montana s. str.	species	Europe	Bulgaria	BG	Sliven	Sliven	Karandila, Sotirya	498	42.72441	26.41114	WGS 84		GPS	T. Trilar, M. Gogala	2005-2020	22.6.2016	recorded				MachineObservation
Other material	TGG-573	M. Gogala, T. Trilar, I. Gjonov						Cicadetta montana s. str.	species	Europe	Bulgaria	BG	Stara Zagora	Kazanlak	Kran, Shipchenska Planina, Buzludzha	1400	42.73406	25.40036	WGS 84		GPS	T. Trilar, M. Gogala	2005-2020	27.6.2016	song heard				HumanObservation
Other material	TGG-583	M. Gogala, T. Trilar, I. Gjonov						Cicadetta montana s. str.	species	Europe	Bulgaria	BG	Stara Zagora	Kazanlak	Shipka, Shipchenska Planina	1118	42.74611	25.32791	WGS 84		GPS	T. Trilar, M. Gogala	2005-2020	27.6.2016	recorded				MachineObservation
Other material	TGG-584	M. Gogala, T. Trilar, I. Gjonov						Cicadetta montana s. str.	species	Europe	Bulgaria	BG	Stara Zagora	Kazanlak	Shipka, Shipchenska Planina, Orlovo gnezdo	1295	42.74960	25.32236	WGS 84		GPS	T. Trilar, M. Gogala	2005-2020	27.6.2016	recorded				MachineObservation
Other material	TGG-586	T. Trilar, I. Gjonov						Cicadetta montana s. str.	species	Europe	Bulgaria	BG	Stara Zagora	Kazanlak	Shipka, Shipchenska Planina, Shipka pass	1241	42.75265	25.32064	WGS 84		GPS	T. Trilar, M. Gogala	2005-2020	8.7.2019	recorded				MachineObservation
Other material	TGG-587	M. Gogala, T. Trilar, I. Gjonov		1	Male	adult	BFUS	Cicadetta montana s. str.	species	Europe	Bulgaria	BG	Sliven	Sliven	Karandila, Ichera	929	42.75388	26.39801	WGS 84		GPS	T. Trilar, M. Gogala	2005-2020	22.6.2016			BFUS	BFUS	PreservedSpecimen
Other material	TGG-588	M. Gogala, T. Trilar, I. Gjonov						Cicadetta montana s. str.	species	Europe	Bulgaria	BG	Sliven	Sliven	Karandila, Ichera	929	42.75388	26.39801	WGS 84		GPS	T. Trilar, M. Gogala	2005-2020	22.6.2016	recorded				MachineObservation
Other material	TGG-591	M. Gogala, T. Trilar, I. Gjonov						Cicadetta montana s. str.	species	Europe	Bulgaria	BG	Tvarditsa	Tvarditsa	Tvardishki prohod, poljana Kuriata	1042	42.76575	25.91995	WGS 84		GPS	T. Trilar, M. Gogala	2005-2020	27.6.2016	song heard				HumanObservation
Other material	TGG-595	M. Gogala, T. Trilar, I. Gjonov						Cicadetta montana s. str.	species	Europe	Bulgaria	BG	Varna	Byala	Banya	290	42.77128	27.79341	WGS 84		GPS	T. Trilar, M. Gogala	2005-2020	23.6.2016	recorded				MachineObservation
Other material	TGG-600	M. Gogala, T. Trilar, I. Gjonov						Cicadetta montana s. str.	species	Europe	Bulgaria	BG	Tvarditsa	Tvarditsa	Haydushka pesen hut	993	42.78546	25.89871	WGS 84		GPS	T. Trilar, M. Gogala	2005-2020	26.6.2016	recorded				MachineObservation
Other material	TGG-601	M. Gogala, T. Trilar, I. Gjonov		1	Female	adult	PMSL	Cicadetta montana s. str.	species	Europe	Bulgaria	BG	Tvarditsa	Tvarditsa	Tvardishki prohod	1045	42.78966	25.89392	WGS 84		GPS	T. Trilar, M. Gogala	2005-2020	26.6.2016			PMSL	PMSL	PreservedSpecimen
Other material	TGG-602	M. Gogala, T. Trilar, I. Gjonov						Cicadetta montana s. str.	species	Europe	Bulgaria	BG	Tvarditsa	Tvarditsa	Tvardishki prohod	1045	42.78966	25.89392	WGS 84		GPS	T. Trilar, M. Gogala	2005-2020	26.6.2016	recorded				MachineObservation
Other material	TGG-603	T. Trilar, I. Gjonov						Cicadetta montana s. str.	species	Europe	Bulgaria	BG	Tvarditsa	Tvarditsa	Tvardishki prohod	1045	42.78966	25.89392	WGS 84		GPS	T. Trilar, M. Gogala	2005-2020	7.7.2019	recorded				MachineObservation
Other material	TGG-607	T. Trilar, I. Gjonov						Cicadetta montana s. str.	species	Europe	Bulgaria	BG	Veliko Tarnovo	Veliko Tarnovo	Lagerite, near Gramadliva hut	901	42.79410	25.65460	WGS 84		GPS	T. Trilar, M. Gogala	2005-2020	7.7.2019	recorded				MachineObservation
Other material	TGG-609	M. Gogala, T. Trilar, I. Gjonov						Cicadetta montana s. str.	species	Europe	Bulgaria	BG	Veliko Tarnovo	Elena	Gorni Tanchevtsi, Haidushka poliana	762	42.81377	25.91059	WGS 84		GPS	T. Trilar, M. Gogala	2005-2020	26.6.2016	recorded				MachineObservation
Other material	TGG-610	M. Gogala, T. Trilar, I. Gjonov						Cicadetta montana s. str.	species	Europe	Bulgaria	BG	Lovech	Teteven	Vasilyovska Mt., Vasilyovska reka, at the end of the valley	794	42.87157	24.43875	WGS 84		GPS	T. Trilar, M. Gogala	2005-2020	30.6.2018	song heard				HumanObservation
Other material	TGG-630	M. Gogala, T. Trilar, I. Gjonov						Cicadetta montana s. str.	species	Europe	Bulgaria	BG	Varna	Dolni Chiflik	Golitsa	215	42.95495	27.56103	WGS 84		GPS	T. Trilar, M. Gogala	2005-2020	24.6.2016	recorded				MachineObservation
