# Supplementary material for: Checklist and provisional atlas of singing cicadas (Hemiptera: Cicadidae) of Bulgaria, based on bioacoustics
Source: Biodivers Data J. 2020 Oct 9;8:e54424. doi: 10.3897/BDJ.8.e54424 (PMC7567745; doi:10.3897/BDJ.8.e54424)
Supplement: Supplementary material 9 — Cicadetta brevipennis s. lat. faunistic data. Checklist and provisional atlas of singing cicadas (Hemiptera: Cicadidae) of Bulgaria, based on bioacoustics [file bdj-08-e54424-s009.csv]

typeStatus	catalogNumber	recordedBy	individualID	individualCount	sex	lifeStage	disposition	scientificName	taxonRank	continent	country	countryCode	stateProvince	municipality	locality	minimumElevationInMeters	decimalLatitude	decimalLongitude	geodeticDatum	georeferencedBy	georeferenceProtocol	identifiedBy	dateIdentified	eventDate	fieldNotes	bibliographicCitation	institutionCode	collectionCode	basisOfRecord
Other material	TGG-029	T. Trilar, I. Gjonov						Cicadetta macedonica	species	Europe	Bulgaria	BG	Kardzhali	Krumovgrad	Avren	721	41.31811	25.72677	WGS 84		GPS	T. Trilar, M. Gogala	2005-2020	3.7.2019	recorded				MachineObservation
Other material	TGG-040	T. Trilar, I. Gjonov						Cicadetta macedonica	species	Europe	Bulgaria	BG	Kardzhali	Krumovgrad	Gorni Yurutsi, Mt. Maglenik	831	41.32749	25.93451	WGS 84		GPS	T. Trilar, M. Gogala	2005-2020	4.7.2019	recorded				MachineObservation
Other material	TGG-041	T. Trilar, I. Gjonov						Cicadetta macedonica	species	Europe	Bulgaria	BG	Kardzhali	Krumovgrad	Gorni Yurutsi, Mt. Maglenik	831	41.32749	25.93451	WGS 84		GPS	T. Trilar, M. Gogala	2005-2020	5.7.2019	recorded				MachineObservation
Other material	TGG-071	M. Gogala, I. Gjonov						Cicadetta macedonica	species	Europe	Bulgaria	BG	Blagoevgrad	Sandanski	Slavyanka Mt. (Ali Botusch Mt.)	986	41.40248	23.58173	WGS 84		GPS	T. Trilar, M. Gogala	2005-2020	24.7.2010	recorded				MachineObservation
Other material	TGG-074	M. Gogala, T. Trilar, I. Gjonov						Cicadetta macedonica	species	Europe	Bulgaria	BG	Blagoevgrad	Sandanski	Slavyanka Mt. (Ali Botusch Mt.)	1100	41.40583	23.59288	WGS 84		GPS	T. Trilar, M. Gogala	2005-2020	24.7.2008	recorded				MachineObservation
Other material	TGG-075	M. Gogala, T. Trilar, I. Gjonov						Cicadetta macedonica	species	Europe	Bulgaria	BG	Blagoevgrad	Sandanski	Slavyanka Mt. (Ali Botusch Mt.)	1100	41.40583	23.59288	WGS 84		GPS	T. Trilar, M. Gogala	2005-2020	25.7.2008	song heard				HumanObservation
Other material	TGG-080	P. Drenski		13	Male	adult	SOFM	Cicadetta macedonica	species	Europe	Bulgaria	BG	Blagoevgrad	Sandanski	Slavyanka Mt. (Ali Botusch Mt.)	1000	41.407	23.589	WGS 84	T. Trilar, I. Gjonov, M. Gogala	label	T. Trilar, M. Gogala	2005-2020	7.6.1935			SOFM	SOFM	PreservedSpecimen
Other material	TGG-081	P. Drenski		15	Female	adult	SOFM	Cicadetta macedonica	species	Europe	Bulgaria	BG	Blagoevgrad	Sandanski	Slavyanka Mt. (Ali Botusch Mt.)	1000	41.407	23.589	WGS 84	T. Trilar, I. Gjonov, M. Gogala	label	T. Trilar, M. Gogala	2005-2020	7.6.1935			SOFM	SOFM	PreservedSpecimen
Other material	TGG-082	P. Drenski		1		nymph	SOFM	Cicadetta macedonica	species	Europe	Bulgaria	BG	Blagoevgrad	Sandanski	Slavyanka Mt. (Ali Botusch Mt.)	1000	41.407	23.589	WGS 84	T. Trilar, I. Gjonov, M. Gogala	label	T. Trilar, M. Gogala	2005-2020	7.6.1935			SOFM	SOFM	PreservedSpecimen
Other material	TGG-084	M. Gogala, T. Trilar, I. Gjonov		3	Female	adult	PMSL	Cicadetta macedonica	species	Europe	Bulgaria	BG	Blagoevgrad	Sandanski	Slavyanka Mt. (Ali Botusch Mt.)	615	41.41529	23.55301	WGS 84		GPS	T. Trilar, M. Gogala	2005-2020	18.6.2009			PMSL	PMSL	PreservedSpecimen
Other material	TGG-085	M. Gogala, T. Trilar, I. Gjonov						Cicadetta macedonica	species	Europe	Bulgaria	BG	Blagoevgrad	Sandanski	Slavyanka Mt. (Ali Botusch Mt.)	615	41.41529	23.55301	WGS 84		GPS	T. Trilar, M. Gogala	2005-2020	19.6.2009	recorded				MachineObservation
Other material	TGG-094	M. Gogala, T. Trilar, I. Gjonov						Cicadetta macedonica	species	Europe	Bulgaria	BG	Blagoevgrad	Sandanski	Slavyanka Mt. (Ali Botusch Mt.)	875	41.43639	23.62982	WGS 84		GPS	T. Trilar, M. Gogala	2005-2020	19.6.2009	recorded				MachineObservation
Other material	TGG-169	T. Trilar, I. Gjonov						Cicadetta macedonica	species	Europe	Bulgaria	BG	Kardzhali	Ardino	Kroyachevo	919	41.61065	25.15911	WGS 84		GPS	T. Trilar, M. Gogala	2005-2020	2.7.2019	recorded				MachineObservation
Other material	TGG-187	M. Gogala, T. Trilar, I. Gjonov						Cicadetta macedonica	species	Europe	Bulgaria	BG	Smolyan	Dospat	deviation Batak-Dospat-Sarnitsa	1491	41.68963	24.12685	WGS 84		GPS	T. Trilar, M. Gogala	2005-2020	18.6.2016	recorded				MachineObservation
Other material	TGG-245	M. Gogala, T. Trilar, I. Gjonov						Cicadetta macedonica	species	Europe	Bulgaria	BG	Smolyan	Chepelare	Hvoyna	701	41.87892	24.69756	WGS 84		GPS	T. Trilar, M. Gogala	2005-2020	21.6.2016	recorded				MachineObservation
Other material	TGG-246	M. Gogala, T. Trilar, I. Gjonov						Cicadetta macedonica	species	Europe	Bulgaria	BG	Plovdiv	Asenovgrad	Narechenski Bani	630	41.89915	24.73884	WGS 84		GPS	T. Trilar, M. Gogala	2005-2020	21.6.2016	recorded				MachineObservation
Other material	TGG-254	I. Gjonov						Cicadetta macedonica	species	Europe	Bulgaria	BG	Burgas	Malko Tarnovo	Slivarovo, Shafariitsa	228	41.96056	27.65972	WGS 84		GPS	I. Gjonov	2005-2020	28.5.2010	recorded				MachineObservation
Other material	TGG-256	M. Gogala, T. Trilar, I. Gjonov						Cicadetta macedonica	species	Europe	Bulgaria	BG	Burgas	Malko Tarnovo	Slivarovo, Rezovska river	222	41.9608	27.65963	WGS 84		GPS	T. Trilar, M. Gogala	2005-2020	23.6.2009	recorded				MachineObservation
Other material	TGG-269	I. Gjonov						Cicadetta macedonica	species	Europe	Bulgaria	BG	Burgas	Malko Tarnovo	Propada	377	41.98167	27.49222	WGS 84		GPS	I. Gjonov	2005-2020	27.5.2010	recorded				MachineObservation
Other material	TGG-271	M. Gogala, T. Trilar, I. Gjonov						Cicadetta macedonica	species	Europe	Bulgaria	BG	Burgas	Malko Tarnovo	Propada	371	41.98167	27.49237	WGS 84		GPS	T. Trilar, M. Gogala	2005-2020	22.6.2009	recorded				MachineObservation
Other material	TGG-276	M. Gogala, T. Trilar, I. Gjonov						Cicadetta macedonica	species	Europe	Bulgaria	BG	Burgas	Malko Tarnovo	Propada, tombs	460	41.98341	27.48485	WGS 84		GPS	T. Trilar, M. Gogala	2005-2020	22.6.2009	recorded				MachineObservation
Other material	TGG-296	M. Gogala, T. Trilar, I. Gjonov						Cicadetta macedonica	species	Europe	Bulgaria	BG	Pazardzhik	Peshtera	Peshtera	520	42.02265	24.28537	WGS 84		GPS	T. Trilar, M. Gogala	2005-2020	26.6.2019	recorded				MachineObservation
Other material	TGG-298	I. Gjonov						Cicadetta macedonica	species	Europe	Bulgaria	BG	Burgas	Malko Tarnovo	Vitanovo reserve	285	42.02278	27.456111	WGS 84		GPS	I. Gjonov	2005-2020	27.5.2010	recorded				MachineObservation
Other material	TGG-312	M. Gogala, T. Trilar, I. Gjonov						Cicadetta macedonica	species	Europe	Bulgaria	BG	Burgas	Malko Tarnovo	Stoilovo, reka Mechi Dol	228	42.03086	27.51321	WGS 84		GPS	T. Trilar, M. Gogala	2005-2020	22.6.2009	recorded				MachineObservation
Other material	TGG-318	M. Gogala, T. Trilar, I. Gjonov						Cicadetta macedonica	species	Europe	Bulgaria	BG	Burgas	Malko Tarnovo	Brashlyan, Boriloto	323	42.04632	27.42786	WGS 84		GPS	T. Trilar, M. Gogala	2005-2020	24.6.2009	recorded				MachineObservation
Other material	TGG-354	M. Gogala, T. Trilar, I. Gjonov						Cicadetta macedonica	species	Europe	Bulgaria	BG	Burgas	Malko Tarnovo	Kalovo, Mladezhka reka, near the broken bridge	162	42.13067	27.49301	WGS 84		GPS	T. Trilar, M. Gogala	2005-2020	22.6.2009	recorded				MachineObservation
Other material	TGG-375	I. Gjonov						Cicadetta macedonica	species	Europe	Bulgaria	BG	Burgas	Malko Tarnovo	Mladezhko, Shafariitsa	213	42.15167	27.36194	WGS 84		GPS	I. Gjonov	2005-2020	28.5.2010	recorded				MachineObservation
Other material	TGG-452	I. Gjonov						Cicadetta macedonica	species	Europe	Bulgaria	BG	Kyustendil	Kyustendil	Tsarvenjano under Radomir peak	1168	42.36500	22.82750	WGS 84		GPS	I. Gjonov	2005-2020	8.6.2010	recorded				MachineObservation
Other material	TGG-455	I. Gjonov		1	Male	adult	BFUS	Cicadetta macedonica	species	Europe	Bulgaria	BG	Pernik	Radomir	Uglyartsi	760	42.3936	22.8847	WGS 84		GPS	T. Trilar, M. Gogala	2005-2020	6.6.2010			BFUS	BFUS	PreservedSpecimen
Other material	TGG-456	I. Gjonov		1	Male	adult	BFUS	Cicadetta macedonica	species	Europe	Bulgaria	BG	Pernik	Radomir	Uglyartsi	760	42.3936	22.8847	WGS 84		GPS	T. Trilar, M. Gogala	2005-2020	8.6.2010			BFUS	BFUS	PreservedSpecimen
Other material	TGG-457	I. Gjonov		2	Male	adult	BFUS	Cicadetta macedonica	species	Europe	Bulgaria	BG	Pernik	Radomir	Uglyartsi	750	42.394159	22.884139	WGS 84		GPS	T. Trilar, M. Gogala	2005-2020	6.6.2010	in alcohol		BFUS	BFUS	PreservedSpecimen
Other material	TGG-458	I. Gjonov		5	Male	adult	BFUS	Cicadetta macedonica	species	Europe	Bulgaria	BG	Pernik	Radomir	Uglyartsi	750	42.394159	22.884139	WGS 84		GPS	T. Trilar, M. Gogala	2005-2020	8.6.2010	in alcohol		BFUS	BFUS	PreservedSpecimen
Other material	TGG-459	I. Gjonov		1	Female	adult	BFUS	Cicadetta macedonica	species	Europe	Bulgaria	BG	Pernik	Radomir	Uglyartsi	750	42.394159	22.884139	WGS 84		GPS	T. Trilar, M. Gogala	2005-2020	8.6.2010	in alcohol		BFUS	BFUS	PreservedSpecimen
Other material	TGG-460	I. Gjonov						Cicadetta macedonica	species	Europe	Bulgaria	BG	Pernik	Radomir	Uglyartsi	750	42.394159	22.884139	WGS 84		GPS	I. Gjonov	2005-2020	8.6.2010	recorded				MachineObservation
Other material	TGG-461	I. Gjonov						Cicadetta macedonica	species	Europe	Bulgaria	BG	Pernik	Radomir	Uglyartsi	750	42.394159	22.884139	WGS 84		GPS	I. Gjonov	2005-2020	5.6.2011	recorded				MachineObservation
Other material	TGG-557	M. Gogala, T. Trilar, I. Gjonov						Cicadetta macedonica	species	Europe	Bulgaria	BG	Sliven	Sliven	Karandila, upper lift station	982	42.71803	26.36090	WGS 84		GPS	T. Trilar, M. Gogala	2005-2020	22.6.2016	recorded				MachineObservation
Other material	TGG-560	M. Gogala, T. Trilar, I. Gjonov						Cicadetta macedonica	species	Europe	Bulgaria	BG	Sliven	Sliven	Karandila, Sinite kamni	1036	42.72112	26.36270	WGS 84		GPS	T. Trilar, M. Gogala	2005-2020	22.6.2016	recorded				MachineObservation
Other material	TGG-563	M. Gogala, T. Trilar, I. Gjonov						Cicadetta macedonica	species	Europe	Bulgaria	BG	Sliven	Sliven	Karandila, Sotirya	480	42.72360	26.41006	WGS 84		GPS	T. Trilar, M. Gogala	2005-2020	21.6.2016	recorded				MachineObservation
Other material	TGG-569	M. Gogala, T. Trilar, I. Gjonov						Cicadetta macedonica	species	Europe	Bulgaria	BG	Sliven	Sliven	Karandila, Sotirya	498	42.72441	26.41114	WGS 84		GPS	T. Trilar, M. Gogala	2005-2020	22.6.2016	recorded				MachineObservation
Other material	TGG-574	M. Gogala, T. Trilar, I. Gjonov						Cicadetta macedonica	species	Europe	Bulgaria	BG	Stara Zagora	Kazanlak	Kran, Shipchenska Planina, Buzludzha	1400	42.73406	25.40036	WGS 84		GPS	T. Trilar, M. Gogala	2005-2020	27.6.2016	recorded				MachineObservation
Other material	TGG-576	M. Gogala, T. Trilar, I. Gjonov		2	Male	adult	PMSL	Cicadetta macedonica	species	Europe	Bulgaria	BG	Sliven	Sliven	Karandila, Ichera	592	42.73740	26.41334	WGS 84		GPS	T. Trilar, M. Gogala	2005-2020	22.6.2016			PMSL	PMSL	PreservedSpecimen
Other material	TGG-577	M. Gogala, T. Trilar, I. Gjonov						Cicadetta macedonica	species	Europe	Bulgaria	BG	Sliven	Sliven	Karandila, Ichera	592	42.73740	26.41334	WGS 84		GPS	T. Trilar, M. Gogala	2005-2020	22.6.2016	recorded				MachineObservation
Other material	TGG-581	T. Trilar, I. Gjonov						Cicadetta macedonica	species	Europe	Bulgaria	BG	Stara Zagora	Kazanlak	Kran, Shipchenska Planina, Buzludzha	1365	42.74031	25.39992	WGS 84		GPS	T. Trilar, M. Gogala	2005-2020	8.7.2019	recorded				MachineObservation
Other material	TGG-585	M. Gogala, T. Trilar, I. Gjonov						Cicadetta macedonica	species	Europe	Bulgaria	BG	Stara Zagora	Kazanlak	Shipka, Shipchenska Planina, Orlovo gnezdo	1295	42.74960	25.32236	WGS 84		GPS	T. Trilar, M. Gogala	2005-2020	27.6.2016	recorded				MachineObservation
Other material	TGG-589	M. Gogala, T. Trilar, I. Gjonov						Cicadetta macedonica	species	Europe	Bulgaria	BG	Sliven	Sliven	Karandila, Ichera	929	42.75388	26.39801	WGS 84		GPS	T. Trilar, M. Gogala	2005-2020	22.6.2016	recorded				MachineObservation
Other material	TGG-592	M. Gogala, T. Trilar, I. Gjonov						Cicadetta macedonica	species	Europe	Bulgaria	BG	Tvarditsa	Tvarditsa	Tvardishki prohod, poljana Kuriata	1042	42.76575	25.91995	WGS 84		GPS	T. Trilar, M. Gogala	2005-2020	27.6.2016	recorded				MachineObservation
Other material	TGG-597	M. Gogala, T. Trilar, I. Gjonov						Cicadetta macedonica	species	Europe	Bulgaria	BG	Varna	Byala	Banya	290	42.77128	27.79341	WGS 84		GPS	T. Trilar, M. Gogala	2005-2020	23.6.2016	recorded				MachineObservation
Other material	TGG-599	M. Gogala, I. Gjonov						Cicadetta macedonica	species	Europe	Bulgaria	BG	Gabrovo	Tryavna	Brezhnitsite, Raikov kladenec	812	42.78341	25.51698	WGS 84		GPS	T. Trilar, M. Gogala	2005-2020	28.7.2010	recorded				MachineObservation
Other material	TGG-605	M. Gogala, T. Trilar, I. Gjonov						Cicadetta macedonica	species	Europe	Bulgaria	BG	Tvarditsa	Tvarditsa	Tvardishki prohod	1045	42.78966	25.89392	WGS 84		GPS	T. Trilar, M. Gogala	2005-2020	26.6.2016	recorded				MachineObservation
Other material	TGG-606	T. Trilar, I. Gjonov						Cicadetta macedonica	species	Europe	Bulgaria	BG	Tvarditsa	Tvarditsa	Tvardishki prohod	1045	42.78966	25.89392	WGS 84		GPS	T. Trilar, M. Gogala	2005-2020	7.7.2019	recorded				MachineObservation
Other material	TGG-608	T. Trilar, I. Gjonov						Cicadetta macedonica	species	Europe	Bulgaria	BG	Veliko Tarnovo	Veliko Tarnovo	Lagerite, near Gramadliva hut	901	42.79410	25.65460	WGS 84		GPS	T. Trilar, M. Gogala	2005-2020	7.7.2019	recorded				MachineObservation
Other material	TGG-650	I. Gjonov						Cicadetta macedonica	species	Europe	Bulgaria	BG	Sofia	Dragoman	Berende izvor, Nishava river	495	42.99194	22.91556	WGS 84		GPS	I. Gjonov	2005-2020	10.7.2011	recorded				MachineObservation
Other material	TGG-682	M. Gogala, T. Trilar, I. Gjonov						Cicadetta macedonica	species	Europe	Bulgaria	BG	Lovech	Lukovit	Karlukovo, under the village	240	43.17042	24.06427	WGS 84		GPS	T. Trilar, M. Gogala	2005-2020	16.6.2009	recorded				MachineObservation
