# Supplementary material for: Checklist and provisional atlas of singing cicadas (Hemiptera: Cicadidae) of Bulgaria, based on bioacoustics
Source: Biodivers Data J. 2020 Oct 9;8:e54424. doi: 10.3897/BDJ.8.e54424 (PMC7567745; doi:10.3897/BDJ.8.e54424)
Supplement: Supplementary material 10 — Cicadetta cantilatrix faunistic data. Checklist and provisional atlas of singing cicadas (Hemiptera: Cicadidae) of Bulgaria, based on bioacoustics [file bdj-08-e54424-s010.csv]

typeStatus	catalogNumber	recordedBy	individualID	individualCount	sex	lifeStage	disposition	scientificName	taxonRank	continent	country	countryCode	stateProvince	municipality	locality	minimumElevationInMeters	decimalLatitude	decimalLongitude	geodeticDatum	georeferencedBy	georeferenceProtocol	identifiedBy	dateIdentified	eventDate	fieldNotes	bibliographicCitation	institutionCode	collectionCode	basisOfRecord
Other material	TGG-386	M. Gogala						Cicadetta cantilatrix	species	Europe	Bulgaria	BG	Kyustendil	Boboshevo	Boboshevo	756	42.15976	22.97789	WGS 84		GPS	T. Trilar, M. Gogala	2005-2020	30.6.2012	recorded				MachineObservation
Other material	TGG-450	I. Gjonov						Cicadetta cantilatrix	species	Europe	Bulgaria	BG	Kyustendil	Kyustendil	Tsarvenjano under Radomir peak	1168	42.36500	22.82750	WGS 84		GPS	I. Gjonov	2005-2020	8.6.2010	recorded				MachineObservation
Other material	TGG-451	I. Gjonov						Cicadetta cantilatrix	species	Europe	Bulgaria	BG	Kyustendil	Kyustendil	Tsarvenjano under Radomir peak	1168	42.36500	22.82750	WGS 84		GPS	I. Gjonov	2005-2020	5.6.2011	recorded				MachineObservation
Other material	TGG-612	M. Gogala, T. Trilar, I. Gjonov						Cicadetta cantilatrix	species	Europe	Bulgaria	BG	Lovech	Teteven	Vasilyovska Mt., Ravnota Usoe	1064	42.88164	24.43906	WGS 84		GPS	T. Trilar, M. Gogala	2005-2020	17.6.2009	recorded				MachineObservation
Other material	TGG-649	I. Gjonov						Cicadetta cantilatrix	species	Europe	Bulgaria	BG	Sofia	Dragoman	Berende izvor, Nishava river	495	42.99194	22.91556	WGS 84		GPS	I. Gjonov	2005-2020	10.7.2011	recorded				MachineObservation
