# Supplementary material for: Checklist and provisional atlas of singing cicadas (Hemiptera: Cicadidae) of Bulgaria, based on bioacoustics
Source: Biodivers Data J. 2020 Oct 9;8:e54424. doi: 10.3897/BDJ.8.e54424 (PMC7567745; doi:10.3897/BDJ.8.e54424)
Supplement: Supplementary material 13 — Oligoglena tibialis faunistic data. Checklist and provisional atlas of singing cicadas (Hemiptera: Cicadidae) of Bulgaria, based on bioacoustics [file bdj-08-e54424-s013.csv]

typeStatus	catalogNumber	recordedBy	individualID	individualCount	sex	lifeStage	disposition	scientificName	taxonRank	continent	country	countryCode	stateProvince	municipality	locality	minimumElevationInMeters	decimalLatitude	decimalLongitude	geodeticDatum	georeferencedBy	georeferenceProtocol	identifiedBy	dateIdentified	eventDate	fieldNotes	bibliographicCitation	institutionCode	collectionCode	basisOfRecord
Other material	TGG-076	M. Gogala, T. Trilar, I. Gjonov		2	Male	adult	PMSL	Oligoglena tibialis	species	Europe	Bulgaria	BG	Blagoevgrad	Sandanski	Slavyanka Mt. (Ali Botusch Mt.)	1100	41.40583	23.59288	WGS 84		GPS	T. Trilar, M. Gogala	2005-2020	25.7.2008			PMSL	PMSL	PreservedSpecimen
Other material	TGG-077	M. Gogala, T. Trilar, I. Gjonov						Oligoglena tibialis	species	Europe	Bulgaria	BG	Blagoevgrad	Sandanski	Slavyanka Mt. (Ali Botusch Mt.)	1100	41.40583	23.59288	WGS 84		GPS	T. Trilar, M. Gogala	2005-2020	25.7.2008	recorded				MachineObservation
Other material	TGG-086	M. Gogala, T. Trilar, I. Gjonov						Oligoglena tibialis	species	Europe	Bulgaria	BG	Blagoevgrad	Sandanski	Slavyanka Mt. (Ali Botusch Mt.)	1026	41.41563	23.69407	WGS 84		GPS	T. Trilar, M. Gogala	2005-2020	19.6.2009	song heard				HumanObservation
Other material	TGG-089	M. Gogala, T. Trilar, I. Gjonov, K. Prosenc Trilar						Oligoglena tibialis	species	Europe	Bulgaria	BG	Kardzhali	Krumovgrad	Skalak, Mahala Sinap, reka Kesebir	252	41.41937	25.64322	WGS 84		GPS	T. Trilar, M. Gogala	2005-2020	10.7.2018	recorded				MachineObservation
Other material	TGG-091	M. Gogala, T. Trilar, I. Gjonov						Oligoglena tibialis	species	Europe	Bulgaria	BG	Blagoevgrad	Sandanski	Slavyanka Mt. (Ali Botusch Mt.)	905	41.42185	23.70017	WGS 84		GPS	T. Trilar, M. Gogala	2005-2020	19.6.2009	song heard				HumanObservation
Other material	TGG-092	M. Gogala, I. Gjonov		1	Male	adult	PMSL	Oligoglena tibialis	species	Europe	Bulgaria	BG	Blagoevgrad	Sandanski	Slavyanka Mt. (Ali Botusch Mt.)	794	41.43321	23.59486	WGS 84		GPS	T. Trilar, M. Gogala	2005-2020	24.7.2010			PMSL	PMSL	PreservedSpecimen
Other material	TGG-093	M. Gogala, I. Gjonov						Oligoglena tibialis	species	Europe	Bulgaria	BG	Blagoevgrad	Sandanski	Slavyanka Mt. (Ali Botusch Mt.)	794	41.43321	23.59486	WGS 84		GPS	T. Trilar, M. Gogala	2005-2020	24.7.2010	recorded				MachineObservation
Other material	TGG-095	M. Gogala, T. Trilar, I. Gjonov		1	Male	adult	PMSL	Oligoglena tibialis	species	Europe	Bulgaria	BG	Blagoevgrad	Sandanski	Slavyanka Mt. (Ali Botusch Mt.)	830	41.43802	23.61102	WGS 84		GPS	T. Trilar, M. Gogala	2005-2020	25.7.2008			PMSL	PMSL	PreservedSpecimen
Other material	TGG-096	M. Gogala, T. Trilar, I. Gjonov						Oligoglena tibialis	species	Europe	Bulgaria	BG	Blagoevgrad	Sandanski	Slavyanka Mt. (Ali Botusch Mt.)	830	41.43802	23.61102	WGS 84		GPS	T. Trilar, M. Gogala	2005-2020	25.7.2008	recorded				MachineObservation
Other material	TGG-114	M. Gogala						Oligoglena tibialis	species	Europe	Bulgaria	BG	Kardzhali	Momchilgrad	Karamfil	500	41.47401	25.54603	WGS 84		GPS	T. Trilar, M. Gogala	2005-2020	4.7.2012	recorded				MachineObservation
Other material	TGG-119	M. Gogala						Oligoglena tibialis	species	Europe	Bulgaria	BG	Haskovo	Ivaylovgrad	Svirachi	315	41.47416	26.11001	WGS 84		GPS	T. Trilar, M. Gogala	2005-2020	6.7.2012	recorded				MachineObservation
Other material	TGG-127							Oligoglena tibialis	species	Europe	Bulgaria	BG	Blagoevgrad	Sandanski	Lozenitsa	340	41.504	23.372	WGS 84	T. Trilar, I. Gjonov, M. Gogala	paper			1.6.1900 - 30.6.1900		Yoakimov 1909 as Cicadetta tibialis Panz.			LiteratureRecord
Other material	TGG-144	M. Gogala						Oligoglena tibialis	species	Europe	Bulgaria	BG	Blagoevgrad	Sandanski	Melnik, Rozhen Monastery	570	41.532606	23.429362	WGS 84		GPS	T. Trilar, M. Gogala	2005-2020	27.6.2012	recorded				MachineObservation
Other material	TGG-149	M. Gogala						Oligoglena tibialis	species	Europe	Bulgaria	BG	Kardzhali	Momchilgrad	Tatul	400	41.54415	25.5468	WGS 84		GPS	T. Trilar, M. Gogala	2005-2020	4.7.2012	recorded				MachineObservation
Other material	TGG-157	T. Trilar, I. Gjonov						Oligoglena tibialis	species	Europe	Bulgaria	BG	Haskovo	Ivaylovgrad	Huhla	173	41.57555	26.07253	WGS 84		GPS	T. Trilar, M. Gogala	2005-2020	6.7.2019	recorded				MachineObservation
Other material	TGG-179	M. Gogala, T. Trilar, I. Gjonov						Oligoglena tibialis	species	Europe	Bulgaria	BG	Kardzhali	Kardzhali	Kardzhali	230	41.64	25.36	WGS 84		GPS	T. Trilar, M. Gogala	2005-2020	21.6.2009	song heard				HumanObservation
Other material	TGG-185	no legit data		1	Male	adult	SOFM	Oligoglena tibialis	species	Europe	Bulgaria	BG	Smolyan	Chepelare	Pamporovo	1570	41.656	24.695	WGS 84	T. Trilar, I. Gjonov, M. Gogala	label	T. Trilar, M. Gogala	2005-2020	1.6.1999 - 30.6.1999			SOFM	SOFM	PreservedSpecimen
Other material	TGG-186	no legit data		1	Female	adult	SOFM	Oligoglena tibialis	species	Europe	Bulgaria	BG	Smolyan	Chepelare	Pamporovo	1570	41.656	24.695	WGS 84	T. Trilar, I. Gjonov, M. Gogala	label	T. Trilar, M. Gogala	2005-2020	1.6.1999 - 30.6.1999			SOFM	SOFM	PreservedSpecimen
Other material	TGG-239	V. Bayramova		1	Male	adult	ZISB	Oligoglena tibialis	species	Europe	Bulgaria	BG	Haskovo	Lyubimets	Lyubimets	70	41.847	26.085	WGS 84	T. Trilar, I. Gjonov, M. Gogala	label	T. Trilar, M. Gogala	2005-2020	18.6.1969			ZISB	ZISB	PreservedSpecimen
Other material	TGG-240	V. Bayramova		1	Female	adult	ZISB	Oligoglena tibialis	species	Europe	Bulgaria	BG	Haskovo	Lyubimets	Lyubimets	70	41.847	26.085	WGS 84	T. Trilar, I. Gjonov, M. Gogala	label	T. Trilar, M. Gogala	2005-2020	18.6.1969			ZISB	ZISB	PreservedSpecimen
Other material	TGG-257	M. Gogala, T. Trilar, I. Gjonov						Oligoglena tibialis	species	Europe	Bulgaria	BG	Burgas	Malko Tarnovo	Slivarovo, Rezovska river	222	41.9608	27.65963	WGS 84		GPS	T. Trilar, M. Gogala	2005-2020	23.6.2009	recorded				MachineObservation
Other material	TGG-262	M. Gogala, T. Trilar, I. Gjonov						Oligoglena tibialis	species	Europe	Bulgaria	BG	Burgas	Malko Tarnovo	Slivarovo, above the village	339	41.97054	27.6588	WGS 84		GPS	T. Trilar, M. Gogala	2005-2020	23.6.2009	recorded				MachineObservation
Other material	TGG-266							Oligoglena tibialis	species	Europe	Bulgaria	BG	Burgas	Malko Tarnovo	Malko Tarnovo	340	41.979	27.525	WGS 84	T. Trilar, I. Gjonov, M. Gogala	paper			20.7.1974		Bairyamova 1976 as Cicadetta tibialis Panz.			LiteratureRecord
Other material	TGG-272	M. Gogala, T. Trilar, I. Gjonov		1	Male	adult	PMSL	Oligoglena tibialis	species	Europe	Bulgaria	BG	Burgas	Malko Tarnovo	Propada	371	41.98167	27.49237	WGS 84		GPS	T. Trilar, M. Gogala	2005-2020	22.6.2009			PMSL	PMSL	PreservedSpecimen
Other material	TGG-273	M. Gogala, T. Trilar, I. Gjonov						Oligoglena tibialis	species	Europe	Bulgaria	BG	Burgas	Malko Tarnovo	Propada	371	41.98167	27.49237	WGS 84		GPS	T. Trilar, M. Gogala	2005-2020	22.6.2009	recorded				MachineObservation
Other material	TGG-277	M. Gogala, T. Trilar, I. Gjonov		1	Male	adult	PMSL	Oligoglena tibialis	species	Europe	Bulgaria	BG	Burgas	Malko Tarnovo	Propada, tombs	460	41.98341	27.48485	WGS 84		GPS	T. Trilar, M. Gogala	2005-2020	22.6.2009			PMSL	PMSL	PreservedSpecimen
Other material	TGG-278	M. Gogala, T. Trilar, I. Gjonov						Oligoglena tibialis	species	Europe	Bulgaria	BG	Burgas	Malko Tarnovo	Propada, tombs	460	41.98341	27.48485	WGS 84		GPS	T. Trilar, M. Gogala	2005-2020	22.6.2009	recorded				MachineObservation
Other material	TGG-283	I. Gjonov		3	Male	adult	BFUS	Oligoglena tibialis	species	Europe	Bulgaria	BG	Burgas	Malko Tarnovo	Malko Tarnovo	325	41.9910	27.520	WGS 84		GPS	T. Trilar, M. Gogala	2005-2020	29.6.2014	(Field.No.: 61/14)		BFUS	BFUS	PreservedSpecimen
Other material	TGG-288	I. Gjonov		1	Male	adult	BFUS	Oligoglena tibialis	species	Europe	Bulgaria	BG	Kyustendil	Nevestino	Smolichano	649	42.1381	22.8053	WGS 84		GPS	T. Trilar, M. Gogala	2005-2020	16.7.2011	(Field.No.: 62/11)		BFUS	BFUS	PreservedSpecimen
Other material	TGG-301	M. Gogala, T. Trilar, I. Gjonov						Oligoglena tibialis	species	Europe	Bulgaria	BG	Burgas	Tsarevo	Rezovo, Silistar	32	42.02597	28.01335	WGS 84		GPS	T. Trilar, M. Gogala	2005-2020	23.6.2009	recorded				MachineObservation
Other material	TGG-303	M. Josifov		1	Female	adult	ZISB	Oligoglena tibialis	species	Europe	Bulgaria	BG	Burgas	Malko Tarnovo	Gramatikovo, Kachul	65	42.026	27.625	WGS 84	T. Trilar, I. Gjonov, M. Gogala	label	T. Trilar, M. Gogala	2005-2020	21.6.1978			ZISB	ZISB	PreservedSpecimen
Other material	TGG-308	M. Gogala, T. Trilar, I. Gjonov						Oligoglena tibialis	species	Europe	Bulgaria	BG	Burgas	Tsarevo	Brodilovo, Hodzhata	263	42.02775	27.80703	WGS 84		GPS	T. Trilar, M. Gogala	2005-2020	23.6.2009	recorded				MachineObservation
Other material	TGG-313	M. Gogala, T. Trilar, I. Gjonov						Oligoglena tibialis	species	Europe	Bulgaria	BG	Burgas	Malko Tarnovo	Stoilovo, reka Mechi Dol	228	42.03086	27.51321	WGS 84		GPS	T. Trilar, M. Gogala	2005-2020	22.6.2009	recorded in the background				MachineObservation
Other material	TGG-320	M. Gogala, T. Trilar, I. Gjonov, K. Prosenc Trilar						Oligoglena tibialis	species	Europe	Bulgaria	BG	Haskovo	Topolovgrad	Sakartsi	482	42.05326	26.34486	WGS 84		GPS	T. Trilar, M. Gogala	2005-2020	9.7.2018	recorded				MachineObservation
Other material	TGG-333	M. Gogala		1	Female	adult	PMSL	Oligoglena tibialis	species	Europe	Bulgaria	BG	Pazardzhik	Pazardzhik	Pazardzhik, Isperihovo	300	42.09472	24.41194	WGS 84		GPS	T. Trilar, M. Gogala	2005-2020	7.7.2012			PMSL	PMSL	PreservedSpecimen
Other material	TGG-338	M. Gogala, T. Trilar, I. Gjonov						Oligoglena tibialis	species	Europe	Bulgaria	BG	Burgas	Malko Tarnovo	Zvezdets, 1.5 km SE	332	42.10523	27.4339	WGS 84		GPS	T. Trilar, M. Gogala	2005-2020	22.6.2009	recorded				MachineObservation
Other material	TGG-346	M. Gogala, T. Trilar, I. Gjonov						Oligoglena tibialis	species	Europe	Bulgaria	BG	Plovdiv	Sadovo	Popovitsa, Ahmatovo	181	42.11513	25.05807	WGS 84		GPS	T. Trilar, M. Gogala	2005-2020	21.6.2016	recorded				MachineObservation
Other material	TGG-359	I. Gjonov						Oligoglena tibialis	species	Europe	Bulgaria	BG	Kyustendil	Nevestino	Smolichano	649	42.13778	22.80528	WGS 84		GPS	I. Gjonov	2005-2020	16.7.2011	recorded				MachineObservation
Other material	TGG-364	M. Gogala, T. Trilar, I. Gjonov		1	Male	adult	PMSL	Oligoglena tibialis	species	Europe	Bulgaria	BG	Burgas	Malko Tarnovo	Zvezdets, Petrova Niva	171	42.13934	27.4465	WGS 84		GPS	T. Trilar, M. Gogala	2005-2020	22.6.2009			PMSL	PMSL	PreservedSpecimen
Other material	TGG-365	M. Gogala, T. Trilar, I. Gjonov						Oligoglena tibialis	species	Europe	Bulgaria	BG	Burgas	Malko Tarnovo	Zvezdets, Petrova Niva	171	42.13934	27.4465	WGS 84		GPS	T. Trilar, M. Gogala	2005-2020	22.6.2009	recorded				MachineObservation
Other material	TGG-370	M. Gogala, T. Trilar, I. Gjonov						Oligoglena tibialis	species	Europe	Bulgaria	BG	Burgas	Tsarevo	Tsarevo, Izgrev	146	42.14546	27.80946	WGS 84		GPS	T. Trilar, M. Gogala	2005-2020	23.6.2009	recorded				MachineObservation
Other material	TGG-384	M. Gogala						Oligoglena tibialis	species	Europe	Bulgaria	BG	Kyustendil	Boboshevo	Boboshevo	620	42.15751	22.98667	WGS 84		GPS	T. Trilar, M. Gogala	2005-2020	30.6.2012	recorded				MachineObservation
Other material	TGG-387	M. Gogala						Oligoglena tibialis	species	Europe	Bulgaria	BG	Kyustendil	Boboshevo	Boboshevo	756	42.15976	22.97789	WGS 84		GPS	T. Trilar, M. Gogala	2005-2020	30.6.2012	recorded				MachineObservation
Other material	TGG-389	I. Gjonov						Oligoglena tibialis	species	Europe	Bulgaria	BG	Kyustendil	Boboshevo	Boboshevo, Jana hut	750	42.16056	22.97667	WGS 84		GPS	I. Gjonov	2005-2020	23.6.2011	recorded				MachineObservation
Other material	TGG-393	M. Gogala, T. Trilar, I. Gjonov						Oligoglena tibialis	species	Europe	Bulgaria	BG	Kyustendil	Boboshevo	Boboshevo	730	42.16394	22.97905	WGS 84		GPS	T. Trilar, M. Gogala	2005-2020	22.7.2008	recorded				MachineObservation
Other material	TGG-398	no legit data		2	Male	adult	SOFM	Oligoglena tibialis	species	Europe	Bulgaria	BG	Burgas	Tsarevo	Tsarevo	35	42.169	27.845	WGS 84	T. Trilar, I. Gjonov, M. Gogala	label	T. Trilar, M. Gogala	2005-2020	1.6.1994 - 30.6.1994			SOFM	SOFM	PreservedSpecimen
Other material	TGG-399	no legit data		1	Female	adult	SOFM	Oligoglena tibialis	species	Europe	Bulgaria	BG	Burgas	Tsarevo	Tsarevo	35	42.169	27.845	WGS 84	T. Trilar, I. Gjonov, M. Gogala	label	T. Trilar, M. Gogala	2005-2020	1.6.1994 - 30.6.1994			SOFM	SOFM	PreservedSpecimen
Other material	TGG-401	M. Gogala, I. Gjonov						Oligoglena tibialis	species	Europe	Bulgaria	BG	Pazardzhik	Belovo	Belovo, Golyamo Belovo Gorge	485	42.16981	23.97388	WGS 84		GPS	T. Trilar, M. Gogala	2005-2020	29.7.2010	recorded				MachineObservation
Other material	TGG-402	M. Gogala, I. Gjonov						Oligoglena tibialis	species	Europe	Bulgaria	BG	Pazardzhik	Belovo	Belovo, Golyamo Belovo Gorge	485	42.16981	23.97388	WGS 84		GPS	T. Trilar, M. Gogala	2005-2020	29.7.2010	recorded				MachineObservation
Other material	TGG-405							Oligoglena tibialis	species	Europe	Bulgaria	BG	Pazardzhik	Pazardzhik	Pazardzhik	210	42.192	24.333	WGS 84	T. Trilar, I. Gjonov, M. Gogala	paper					Nedyalkov 1908 as Cicadetta tibialis Panz.			LiteratureRecord
Other material	TGG-406	N. Nedelkov		2	Male	adult	SOFM	Oligoglena tibialis	species	Europe	Bulgaria	BG	Pazardzhik	Pazardzhik	Pazardzhik	210	42.192	24.333	WGS 84	T. Trilar, I. Gjonov, M. Gogala	label	T. Trilar, M. Gogala	2005-2020				SOFM	SOFM	PreservedSpecimen
Other material	TGG-408	I. Gjonov		1	Female	adult	BFUS	Oligoglena tibialis	species	Europe	Bulgaria	BG	Burgas	Malko Tarnovo	Bliznak, Bataka	337	42.1950	27.330	WGS 84		GPS	T. Trilar, M. Gogala	2005-2020	28.6.2014	(Field.No.: 62/14)		BFUS	BFUS	PreservedSpecimen
Other material	TGG-409							Oligoglena tibialis	species	Europe	Bulgaria	BG	Stara Zagora	Chirpan	Chirpan	185	42.202	25.324	WGS 84	T. Trilar, I. Gjonov, M. Gogala	paper					Nedyalkov 1908 as Cicadetta tibialis Panz.			LiteratureRecord
Other material	TGG-415	I. Gjonov		1	Male	adult	BFUS	Oligoglena tibialis	species	Europe	Bulgaria	BG	Burgas	Primorsko	Kiten, oak forest	40	42.2442	27.7581	WGS 84		GPS	T. Trilar, M. Gogala	2005-2020	26.6.2011	(Field.No.: 62/14)		BFUS	BFUS	PreservedSpecimen
Other material	TGG-420	I. Gjonov						Oligoglena tibialis	species	Europe	Bulgaria	BG	Burgas	Primorsko	Jasna poljana	10	42.25889	27.73111	WGS 84		GPS	I. Gjonov	2005-2020	25.6.2011	recorded				MachineObservation
Other material	TGG-426	M. Josifov		1	Female	adult	SOFM	Oligoglena tibialis	species	Europe	Bulgaria	BG	Burgas	Primorsko	Primorsko	20	42.268	27.753	WGS 84	T. Trilar, I. Gjonov, M. Gogala	label	T. Trilar, M. Gogala	2005-2020	14.7.1955			SOFM	SOFM	PreservedSpecimen
Other material	TGG-429	D. Gradinarov		4	Male	adult	BFUS	Oligoglena tibialis	species	Europe	Bulgaria	BG	Burgas	Primorsko	Novo Panicharevo	60	42.28441	27.557285	WGS 84	T. Trilar, I. Gjonov, M. Gogala	label	T. Trilar, M. Gogala	2005-2020	7.7.2017			BFUS	BFUS	PreservedSpecimen
Other material	TGG-430	D. Gradinarov		7	Female	adult	BFUS	Oligoglena tibialis	species	Europe	Bulgaria	BG	Burgas	Primorsko	Novo Panicharevo	60	42.28441	27.557285	WGS 84	T. Trilar, I. Gjonov, M. Gogala	label	T. Trilar, M. Gogala	2005-2020	7.7.2017			BFUS	BFUS	PreservedSpecimen
Other material	TGG-431	I. Gjonov						Oligoglena tibialis	species	Europe	Bulgaria	BG	Burgas	Primorsko	Primorsko, Perla beach	9	42.28556	27.75250	WGS 84		GPS	I. Gjonov	2005-2020	30.5.2010	recorded				MachineObservation
Other material	TGG-433	V. Bayramova		1	Male	adult	ZISB	Oligoglena tibialis	species	Europe	Bulgaria	BG	Burgas	Primorsko	river Ropotamo	20	42.301	27.641	WGS 84	T. Trilar, I. Gjonov, M. Gogala	label	T. Trilar, M. Gogala	2005-2020	20.7.1964			ZISB	ZISB	PreservedSpecimen
Other material	TGG-443	M. Gogala, T. Trilar, I. Gjonov						Oligoglena tibialis	species	Europe	Bulgaria	BG	Burgas	Primorsko	Primorsko, Maslen nos	22	42.30988	27.78541	WGS 84		GPS	T. Trilar, M. Gogala	2005-2020	23.6.2009	recorded				MachineObservation
Other material	TGG-453	M. Gogala, I. Gjonov						Oligoglena tibialis	species	Europe	Bulgaria	BG	Pernik	Radomir	Uglyartsi	758	42.39115	22.87553	WGS 84		GPS	T. Trilar, M. Gogala	2005-2020	30.7.2010	recorded				MachineObservation
Other material	TGG-465	I. Gjonov						Oligoglena tibialis	species	Europe	Bulgaria	BG	Kyustendil	Kyustendil	Polska Skakavitsa	841	42.39889	22.68528	WGS 84		GPS	I. Gjonov	2005-2020	13.7.2011	recorded				MachineObservation
Other material	TGG-467	I. Gjonov		2	Male	adult	BFUS	Oligoglena tibialis	species	Europe	Bulgaria	BG	Kyustendil	Kyustendil	Polska Skakavitsa	520	42.4139	22.6875	WGS 84		GPS	T. Trilar, M. Gogala	2005-2020	30.6.2017	(Field.No.: 17/17)		BFUS	BFUS	PreservedSpecimen
Other material	TGG-468	I. Gjonov		1	Female	adult	BFUS	Oligoglena tibialis	species	Europe	Bulgaria	BG	Kyustendil	Kyustendil	Polska Skakavitsa	520	42.4139	22.6875	WGS 84		GPS	T. Trilar, M. Gogala	2005-2020	30.6.2017	(Field.No.: 17/17)		BFUS	BFUS	PreservedSpecimen
Other material	TGG-475							Oligoglena tibialis	species	Europe	Bulgaria	BG	Sofia	Ihtiman	Ihtiman	640	42.438	23.816	WGS 84	T. Trilar, I. Gjonov, M. Gogala	paper					Nedyalkov 1908 as Cicadetta tibialis Panz.			LiteratureRecord
Other material	TGG-481	D. Gradinarov		2	Male	adult	BFUS	Oligoglena tibialis	species	Europe	Bulgaria	BG	Burgas	Sozopol	Atia, Rosenets Bech	10	42.45042	27.59508	WGS 84	T. Trilar, I. Gjonov, M. Gogala	label	T. Trilar, M. Gogala	2005-2020	4.7.2017			BFUS	BFUS	PreservedSpecimen
Other material	TGG-483	D. Iltschev		1	Male	adult	SOFM	Oligoglena tibialis	species	Europe	Bulgaria	BG	Burgas	Burgas	Burgas, Giol-Tepe	50	42.457	27.414	WGS 84	T. Trilar, I. Gjonov, M. Gogala	label	T. Trilar, M. Gogala	2005-2020	3.7.1912			SOFM	SOFM	PreservedSpecimen
Other material	TGG-487	M. Gogala, T. Trilar, I. Gjonov						Oligoglena tibialis	species	Europe	Bulgaria	BG	Pernik	Pernik	Bosnek	1069	42.49663	23.2283	WGS 84		GPS	T. Trilar, M. Gogala	2005-2020	17.6.2009	recorded				MachineObservation
Other material	TGG-491	M. Gogala, T. Trilar, I. Gjonov, K. Prosenc Trilar						Oligoglena tibialis	species	Europe	Bulgaria	BG	Sofia	Ichtiman	Ihtimanska Sredna Gora	1062	42.54127	23.80908	WGS 84		GPS	T. Trilar, M. Gogala	2005-2020	11.7.2018	recorded				MachineObservation
Other material	TGG-496	S. Minkova		1	Female	adult	SOFM	Oligoglena tibialis	species	Europe	Bulgaria	BG	Pazardzhik	Panagyurishte	Panagyurski kolonii	1050	42.582	24.199	WGS 84	T. Trilar, I. Gjonov, M. Gogala	label	T. Trilar, M. Gogala	2005-2020	10.9.1953			SOFM	SOFM	PreservedSpecimen
Other material	TGG-499	M. Gogala, T. Trilar, I. Gjonov						Oligoglena tibialis	species	Europe	Bulgaria	BG	Sofia	Pancharevo	Sofia, Pancharevo	863	42.58652	23.38258	WGS 84		GPS	T. Trilar, M. Gogala	2005-2020	15.6.2009	song heard				HumanObservation
Other material	TGG-504	M. Gogala, T. Trilar, I. Gjonov						Oligoglena tibialis	species	Europe	Bulgaria	BG	Sofia	Sofia	Sofia, German	739	42.60755	23.42921	WGS 84		GPS	T. Trilar, M. Gogala	2005-2020	15.6.2009	song heard				HumanObservation
Other material	TGG-512							Oligoglena tibialis	species	Europe	Bulgaria	BG	Sofia City	Sofia	Lyulin	930	42.654	23.195	WGS 84	T. Trilar, I. Gjonov, M. Gogala	paper			1.6.1908 - 30.6.1908		Yoakimov 1909 as Cicadetta tibialis Panz.			LiteratureRecord
Other material	TGG-519	T. Trilar, I. Gjonov						Oligoglena tibialis	species	Europe	Bulgaria	BG	Sliven	Sliven	Sliven, Hamambair park	318	42.67104	26.31901	WGS 84		GPS	T. Trilar, M. Gogala	2005-2020	7.7.2019	recorded				MachineObservation
Other material	TGG-540	T. Trilar, I. Gjonov						Oligoglena tibialis	species	Europe	Bulgaria	BG	Sliven	Sliven	Sliven, Komluka, slope	483	42.69007	26.30837	WGS 84		GPS	T. Trilar, M. Gogala	2005-2020	7.7.2019	recorded				MachineObservation
Other material	TGG-548	M. Gogala, T. Trilar, I. Gjonov						Oligoglena tibialis	species	Europe	Bulgaria	BG	Burgas	Aytos	Aytos, Maglen	209	42.70329	27.30364	WGS 84		GPS	T. Trilar, M. Gogala	2005-2020	23.6.2016	recorded				MachineObservation
Other material	TGG-553	T. Trilar, I. Gjonov		2	Male	adult	PMSL	Oligoglena tibialis	species	Europe	Bulgaria	BG	Sliven	Sliven	Sliven, Predela, gorge under the dam of lake Asenovets	386	42.71185	26.26145	WGS 84		GPS	T. Trilar, M. Gogala	2005-2020	7.7.2019			PMSL	PMSL	PreservedSpecimen
Other material	TGG-554	T. Trilar, I. Gjonov						Oligoglena tibialis	species	Europe	Bulgaria	BG	Sliven	Sliven	Sliven, Predela, gorge under the dam of lake Asenovets	386	42.71185	26.26145	WGS 84		GPS	T. Trilar, M. Gogala	2005-2020	7.7.2019	recorded				MachineObservation
Other material	TGG-558	M. Gogala, T. Trilar, I. Gjonov						Oligoglena tibialis	species	Europe	Bulgaria	BG	Burgas	Aytos	Aytos, Hisaria	265	42.72007	27.23771	WGS 84		GPS	T. Trilar, M. Gogala	2005-2020	23.6.2016	recorded				MachineObservation
Other material	TGG-565	M. Josifov		1	Male	adult	ZISB	Oligoglena tibialis	species	Europe	Bulgaria	BG	Burgas	Nessebar	north of Nessebar	150	42.724	27.738	WGS 84	T. Trilar, I. Gjonov, M. Gogala	label	T. Trilar, M. Gogala	2005-2020	5.7.1982			ZISB	ZISB	PreservedSpecimen
Other material	TGG-570	M. Gogala, T. Trilar, I. Gjonov						Oligoglena tibialis	species	Europe	Bulgaria	BG	Sliven	Sliven	Karandila, Sotirya	498	42.72441	26.41114	WGS 84		GPS	T. Trilar, M. Gogala	2005-2020	22.6.2016	recorded				MachineObservation
Other material	TGG-578	M. Gogala, T. Trilar, I. Gjonov						Oligoglena tibialis	species	Europe	Bulgaria	BG	Sliven	Sliven	Karandila, Ichera	592	42.73740	26.41334	WGS 84		GPS	T. Trilar, M. Gogala	2005-2020	22.6.2016	recorded				MachineObservation
Other material	TGG-590	M. Gogala, T. Trilar, I. Gjonov						Oligoglena tibialis	species	Europe	Bulgaria	BG	Sliven	Sliven	Karandila, Ichera	929	42.75388	26.39801	WGS 84		GPS	T. Trilar, M. Gogala	2005-2020	22.6.2016	recorded				MachineObservation
Other material	TGG-613	I. Gjonov						Oligoglena tibialis	species	Europe	Bulgaria	BG	Lovech	Teteven	Vasilyovo	1349	42.88861	24.44167	WGS 84		GPS	I. Gjonov	2005-2020	19.6.2010	recorded				MachineObservation
Other material	TGG-620	M. Gogala, T. Trilar, I. Gjonov, K. Prosenc Trilar						Oligoglena tibialis	species	Europe	Bulgaria	BG	Burgas	Ruen	Dobromir	134	42.92858	27.28668	WGS 84		GPS	T. Trilar, M. Gogala	2005-2020	5.7.2018	recorded				MachineObservation
Other material	TGG-623	M. Gogala, T. Trilar, I. Gjonov, K.		1	Female	adult	BFUS	Oligoglena tibialis	species	Europe	Bulgaria	BG	Burgas	Ruen	Dobromir	130	42.9293	27.2877	WGS 84		GPS	T. Trilar, M. Gogala	2005-2020	5.7.2018			BFUS	BFUS	PreservedSpecimen
Other material	TGG-632	M. Gogala, T. Trilar, I. Gjonov						Oligoglena tibialis	species	Europe	Bulgaria	BG	Varna	Dolni Chiflik	Golitsa	215	42.95495	27.56103	WGS 84		GPS	T. Trilar, M. Gogala	2005-2020	24.6.2016	recorded				MachineObservation
Other material	TGG-643	I. Gjonov						Oligoglena tibialis	species	Europe	Bulgaria	BG	Varna	Dolni Chiflik	Goren Chiflik	102	42.98139	27.58056	WGS 84		GPS	I. Gjonov	2005-2020	25.7.2011	recorded				MachineObservation
Other material	TGG-646	M. Gogala, T. Trilar, I. Gjonov						Oligoglena tibialis	species	Europe	Bulgaria	BG	Varna	Dolni Chiflik	Staro Oryahovo, Shkorpilovtsi	27	42.98152	27.88941	WGS 84		GPS	T. Trilar, M. Gogala	2005-2020	24.6.2016	recorded				MachineObservation
Other material	TGG-654	T. Trilar, I. Gjonov						Oligoglena tibialis	species	Europe	Bulgaria	BG	Lovech	Yablanitsa	Zlatna Panega, quarry	413	43.06899	24.13303	WGS 84		GPS	T. Trilar, M. Gogala	2005-2020	9.7.2019	recorded				MachineObservation
Other material	TGG-660	D. Joakimov		1	Female	adult	SOFM	Oligoglena tibialis	species	Europe	Bulgaria	BG	Veliko Tarnovo	Veliko Tarnovo	Veliko Tarnovo	215	43.075	25.617	WGS 84	T. Trilar, I. Gjonov, M. Gogala	label	T. Trilar, M. Gogala	2005-2020	1.7.1900 - 31.7.1900			SOFM	SOFM	PreservedSpecimen
Other material	TGG-665	P. Drensky		1	Male	adult	SOFM	Oligoglena tibialis	species	Europe	Bulgaria	BG	Sofia	Svoge	Stara Planina, Iskar gorge, Gara Lakatnik	380	43.079	23.374	WGS 84	T. Trilar, I. Gjonov, M. Gogala	label	T. Trilar, M. Gogala	2005-2020	8.7.1948			SOFM	SOFM	PreservedSpecimen
Other material	TGG-669	no legit data		1	Male	adult	SOFM	Oligoglena tibialis	species	Europe	Bulgaria	BG	Lovech	Yablanitsa	Zlatna Panega	200	43.091	24.151	WGS 84	T. Trilar, I. Gjonov, M. Gogala	label	T. Trilar, M. Gogala	2005-2020	15.7.1949			SOFM	SOFM	PreservedSpecimen
Other material	TGG-670	Kr. Tulesctkow		1	Female	adult	SOFM	Oligoglena tibialis	species	Europe	Bulgaria	BG	Veliko Tarnovo	Veliko Tarnovo	Veliko Tarnovo, Preobrazhenski Monastery	290	43.117	25.606	WGS 84	T. Trilar, I. Gjonov, M. Gogala	label	T. Trilar, M. Gogala	2005-2020	24.7.1948			SOFM	SOFM	PreservedSpecimen
Other material	TGG-673	M. Gogala, T. Trilar, I. Gjonov, K. Prosenc Trilar						Oligoglena tibialis	species	Europe	Bulgaria	BG	Targovishte	Omurtag	Omurtag, Belomortsi	423	43.12820	26.44456	WGS 84		GPS	T. Trilar, M. Gogala	2005-2020	1.7.2018	song heard				HumanObservation
Other material	TGG-674	T. Trilar, I. Gjonov						Oligoglena tibialis	species	Europe	Bulgaria	BG	Lovech	Lukovit	Rumyatsevo	232	43.12903	24.14538	WGS 84		GPS	T. Trilar, M. Gogala	2005-2020	9.7.2019	recorded				MachineObservation
Other material	TGG-683	N. Simov		1	Female	adult	SOFM	Oligoglena tibialis	species	Europe	Bulgaria	BG	Lovech	Lukovit	2 km NE from Karlukovo Village	250	43.172	24.075	WGS 84	T. Trilar, I. Gjonov, M. Gogala	label	T. Trilar, M. Gogala	2005-2020	11.7.2008			SOFM	SOFM	PreservedSpecimen
Other material	TGG-685	M. Gogala, T. Trilar, I. Gjonov						Oligoglena tibialis	species	Europe	Bulgaria	BG	Lovech	Lukovit	Karlukovo, Prohodna cave	234	43.1748	24.07471	WGS 84		GPS	T. Trilar, M. Gogala	2005-2020	16.6.2009	recorded				MachineObservation
Other material	TGG-687	M. Gogala, T. Trilar, I. Gjonov						Oligoglena tibialis	species	Europe	Bulgaria	BG	Lovech	Lukovit	Karlukovo	262	43.1752	24.07245	WGS 84		GPS	T. Trilar, M. Gogala	2005-2020	16.6.2009	recorded				MachineObservation
Other material	TGG-701	S. Minkova		1	Female	adult	SOFM	Oligoglena tibialis	species	Europe	Bulgaria	BG	Vratsa	Vratsa	Vratsa	360	43.211	23.552	WGS 84	T. Trilar, I. Gjonov, M. Gogala	label	T. Trilar, M. Gogala	2005-2020	15.7.1953			SOFM	SOFM	PreservedSpecimen
Other material	TGG-710							Oligoglena tibialis	species	Europe	Bulgaria	BG	Varna	Varna	Varna	60	43.214	27.914	WGS 84	T. Trilar, I. Gjonov, M. Gogala	paper					Nedyalkov 1908 as Cicadetta tibialis Panz.			LiteratureRecord
Other material	TGG-711	Taborsky						Oligoglena tibialis	species	Europe	Bulgaria	BG	Varna	Varna	Varna	60	43.214	27.914	WGS 84	T. Trilar, I. Gjonov, M. Gogala	paper			1.6.1934 - 30.6.1934		Dlabola 1955 as Cicadetta tibialis Panz.			LiteratureRecord
Other material	TGG-712	N. Karnoschitzky		1	Male	adult	SOFM	Oligoglena tibialis	species	Europe	Bulgaria	BG	Varna	Varna	Varna	60	43.214	27.914	WGS 84	T. Trilar, I. Gjonov, M. Gogala	label	T. Trilar, M. Gogala	2005-2020	18.6.1950			SOFM	SOFM	PreservedSpecimen
Other material	TGG-713	N Karnoschitzky		2	Male	adult	SOFM	Oligoglena tibialis	species	Europe	Bulgaria	BG	Varna	Varna	Varna	60	43.214	27.914	WGS 84	T. Trilar, I. Gjonov, M. Gogala	label	T. Trilar, M. Gogala	2005-2020	26.6.1948			SOFM	SOFM	PreservedSpecimen
Other material	TGG-714	N Karnoschitzky		1	Female	adult	SOFM	Oligoglena tibialis	species	Europe	Bulgaria	BG	Varna	Varna	Varna	60	43.214	27.914	WGS 84	T. Trilar, I. Gjonov, M. Gogala	label	T. Trilar, M. Gogala	2005-2020	26.6.1948			SOFM	SOFM	PreservedSpecimen
Other material	TGG-715	N. Vichodynsky		3	Male	adult	SOFM	Oligoglena tibialis	species	Europe	Bulgaria	BG	Varna	Varna	Varna	60	43.214	27.914	WGS 84	T. Trilar, I. Gjonov, M. Gogala	label	T. Trilar, M. Gogala	2005-2020	20.7.1943			SOFM	SOFM	PreservedSpecimen
Other material	TGG-716	N. Vichodynsky		1	Male	adult	SOFM	Oligoglena tibialis	species	Europe	Bulgaria	BG	Varna	Varna	Varna	60	43.214	27.914	WGS 84	T. Trilar, I. Gjonov, M. Gogala	label	T. Trilar, M. Gogala	2005-2020	22.6.1943			SOFM	SOFM	PreservedSpecimen
Other material	TGG-717	N. Vichodynsky		2	Female	adult	SOFM	Oligoglena tibialis	species	Europe	Bulgaria	BG	Varna	Varna	Varna	60	43.214	27.914	WGS 84	T. Trilar, I. Gjonov, M. Gogala	label	T. Trilar, M. Gogala	2005-2020	22.6.1943			SOFM	SOFM	PreservedSpecimen
Other material	TGG-728	M. Gogala, T. Trilar, I. Gjonov, K. Prosenc Trilar						Oligoglena tibialis	species	Europe	Bulgaria	BG	Varna	Varna	Varna, Botanical garden of the Sofia University	65	43.23598	28.00225	WGS 84		GPS	T. Trilar, M. Gogala	2005-2020	3.7.2018	recorded				MachineObservation
Other material	TGG-734	K. Hristova		1	Male	adult	BFUS	Oligoglena tibialis	species	Europe	Bulgaria	BG	Varna	Varna	Varna, Botanical garden of the Sofia University	72	43.23769	27.99762	WGS 84	T. Trilar, I. Gjonov, M. Gogala	label	T. Trilar, M. Gogala	2005-2020	12.6.2001			BFUS	BFUS	PreservedSpecimen
Other material	TGG-735	A. Dragomirova		1	Male	adult	BFUS	Oligoglena tibialis	species	Europe	Bulgaria	BG	Varna	Varna	Varna, Botanical garden of the Sofia University	72	43.23769	27.99762	WGS 84	T. Trilar, I. Gjonov, M. Gogala	label	T. Trilar, M. Gogala	2005-2020	27.6.2004			BFUS	BFUS	PreservedSpecimen
Other material	TGG-736	Hanova		1	Male	adult	BFUS	Oligoglena tibialis	species	Europe	Bulgaria	BG	Varna	Varna	Varna, Botanical garden of the Sofia University	72	43.23769	27.99762	WGS 84	T. Trilar, I. Gjonov, M. Gogala	label	T. Trilar, M. Gogala	2005-2020	26.6.2013			BFUS	BFUS	PreservedSpecimen
Other material	TGG-737	M. Gogala, T. Trilar, I. Gjonov, K. Prosenc Trilar						Oligoglena tibialis	species	Europe	Bulgaria	BG	Varna	Varna	Varna, Botanical garden of the Sofia University	72	43.23769	27.99762	WGS 84		GPS	T. Trilar, M. Gogala	2005-2020	3.7.2018	recorded				MachineObservation
Other material	TGG-747	I. Gjonov		3	Male	adult	BFUS	Oligoglena tibialis	species	Europe	Bulgaria	BG	Varna	Devnya	Devnya, Kipra	120	43.2465	27.5853	WGS 84		GPS	T. Trilar, M. Gogala	2005-2020	19.6.2016	(Field.No.: 6/16)		BFUS	BFUS	PreservedSpecimen
Other material	TGG-749	M. Gogala, T. Trilar, I. Gjonov, K. Prosenc Trilar		1	Male	adult	PMSL	Oligoglena tibialis	species	Europe	Bulgaria	BG	Varna	Devnya	Devnya, Kipra	127	43.24841	27.58338	WGS 84		GPS	T. Trilar, M. Gogala	2005-2020	1.7.2018			PMSL	PMSL	PreservedSpecimen
Other material	TGG-750	M. Gogala, T. Trilar, I. Gjonov, K. Prosenc Trilar		1	Female	adult	PMSL	Oligoglena tibialis	species	Europe	Bulgaria	BG	Varna	Devnya	Devnya, Kipra	127	43.24841	27.58338	WGS 84		GPS	T. Trilar, M. Gogala	2005-2020	1.7.2018			PMSL	PMSL	PreservedSpecimen
Other material	TGG-751	M. Gogala, T. Trilar, I. Gjonov, K. Prosenc Trilar						Oligoglena tibialis	species	Europe	Bulgaria	BG	Varna	Devnya	Devnya, Kipra	127	43.24841	27.58338	WGS 84		GPS	T. Trilar, M. Gogala	2005-2020	1.7.2018	recorded				MachineObservation
Other material	TGG-753	M. Gogala, T. Trilar, I. Gjonov, K. Prosenc Trilar						Oligoglena tibialis	species	Europe	Bulgaria	BG	Varna	Varna	Varna, Vinitsa	191	43.25151	28.00015	WGS 84		GPS	T. Trilar, M. Gogala	2005-2020	4.7.2018	recorded				MachineObservation
Other material	TGG-757	M. Gogala, T. Trilar, I. Gjonov						Oligoglena tibialis	species	Europe	Bulgaria	BG	Montana	Varshets	Cherkaski	338	43.26306	23.31224	WGS 84		GPS	T. Trilar, M. Gogala	2005-2020	16.6.2009	recorded				MachineObservation
Other material	TGG-760	M. Gogala, T. Trilar, I. Gjonov		1	Female	adult	PMSL	Oligoglena tibialis	species	Europe	Bulgaria	BG	Varna	Suvorovo	Suvorovo, Chernevo	159	43.27870	27.58627	WGS 84		GPS	T. Trilar, M. Gogala	2005-2020	26.6.2016			PMSL	PMSL	PreservedSpecimen
Other material	TGG-761	M. Gogala, T. Trilar, I. Gjonov						Oligoglena tibialis	species	Europe	Bulgaria	BG	Varna	Suvorovo	Suvorovo, Chernevo	159	43.27870	27.58627	WGS 84		GPS	T. Trilar, M. Gogala	2005-2020	26.6.2016	recorded				MachineObservation
Other material	TGG-765	G. Peshev		1	Female	adult	SOFM	Oligoglena tibialis	species	Europe	Bulgaria	BG	Pleven	Pleven	Pleven, Chernelka	140	43.341	24.541	WGS 84	T. Trilar, I. Gjonov, M. Gogala	label	T. Trilar, M. Gogala	2005-2020	30.7.1973			SOFM	SOFM	PreservedSpecimen
Other material	TGG-766	M. Gogala, I. Gjonov						Oligoglena tibialis	species	Europe	Bulgaria	BG	Veliko Tarnovo	Strazhitsa	Nova Varbovka	337	43.34986	25.90561	WGS 84		GPS	T. Trilar, M. Gogala	2005-2020	28.7.2010	recorded				MachineObservation
Other material	TGG-775	M. Gogala, T. Trilar, I. Gjonov		1	Male	adult	BFUS	Oligoglena tibialis	species	Europe	Bulgaria	BG	Dobrich	Kavarna	Balgarevo, Kaliakra cape	60	43.38137	28.45804	WGS 84		GPS	T. Trilar, M. Gogala	2005-2020	25.6.2016			BFUS	BFUS	PreservedSpecimen
Other material	TGG-776	M. Gogala, T. Trilar, I. Gjonov						Oligoglena tibialis	species	Europe	Bulgaria	BG	Dobrich	Kavarna	Balgarevo, Kaliakra cape	60	43.38137	28.45804	WGS 84		GPS	T. Trilar, M. Gogala	2005-2020	25.6.2016	recorded				MachineObservation
Other material	TGG-782	M. Gogala, T. Trilar, I. Gjonov						Oligoglena tibialis	species	Europe	Bulgaria	BG	Dobrich	Kavarna	Balgarevo, Kaliakra cape	66	43.38361	28.45478	WGS 84		GPS	T. Trilar, M. Gogala	2005-2020	25.6.2016	recorded				MachineObservation
Other material	TGG-787	M. Gogala, T. Trilar, I. Gjonov		5	Male	adult	PMSL	Oligoglena tibialis	species	Europe	Bulgaria	BG	Dobrich	Kavarna	Balgarevo, Kaliakra cape	61	43.38645	28.45287	WGS 84		GPS	T. Trilar, M. Gogala	2005-2020	24.6.2016			PMSL	PMSL	PreservedSpecimen
Other material	TGG-788	M. Gogala, T. Trilar, I. Gjonov		4	Male	adult	BFUS	Oligoglena tibialis	species	Europe	Bulgaria	BG	Dobrich	Kavarna	Balgarevo, Kaliakra cape	61	43.38645	28.45287	WGS 84		GPS	T. Trilar, M. Gogala	2005-2020	24.6.2016			BFUS	BFUS	PreservedSpecimen
Other material	TGG-789	M. Gogala, T. Trilar, I. Gjonov		1	Female	adult	BFUS	Oligoglena tibialis	species	Europe	Bulgaria	BG	Dobrich	Kavarna	Balgarevo, Kaliakra cape	61	43.38645	28.45287	WGS 84		GPS	T. Trilar, M. Gogala	2005-2020	24.6.2016			BFUS	BFUS	PreservedSpecimen
Other material	TGG-790	M. Gogala, T. Trilar, I. Gjonov						Oligoglena tibialis	species	Europe	Bulgaria	BG	Dobrich	Kavarna	Balgarevo, Kaliakra cape	61	43.38645	28.45287	WGS 84		GPS	T. Trilar, M. Gogala	2005-2020	24.6.2016	recorded				MachineObservation
Other material	TGG-795	M. Gogala, T. Trilar, I. Gjonov						Oligoglena tibialis	species	Europe	Bulgaria	BG	Dobrich	Kavarna	Balgarevo, Kaliakra cape	68	43.39188	28.45619	WGS 84		GPS	T. Trilar, M. Gogala	2005-2020	25.6.2016	recorded				MachineObservation
Other material	TGG-797	D. Gradinarov		1	Female	adult	BFUS	Oligoglena tibialis	species	Europe	Bulgaria	BG	Dobrich	Kavarna	Sveti Nikola, Rusalka dunes	10	43.41593	28.51495	WGS 84	T. Trilar, I. Gjonov, M. Gogala	label	T. Trilar, M. Gogala	2005-2020	7.7.2017			BFUS	BFUS	PreservedSpecimen
Other material	TGG-799	I. Gjonov						Oligoglena tibialis	species	Europe	Bulgaria	BG	Dobrich	Dobrichka	Dobrudzha, Batovo	122	43.416	27.941	WGS 84		GPS	I. Gjonov	2005-2020	23.6.2014	recorded				MachineObservation
Other material	TGG-800	I. Gjonov		1	Male	adult	BFUS	Oligoglena tibialis	species	Europe	Bulgaria	BG	Dobrich	Dobrichka	Obrochishte, Dobrudzha, Batovo	122	43.4160	27.9410	WGS 84		GPS	T. Trilar, M. Gogala	2005-2020	4.7.2018			BFUS	BFUS	PreservedSpecimen
Other material	TGG-801	I. Gjonov		1	Female	adult	BFUS	Oligoglena tibialis	species	Europe	Bulgaria	BG	Dobrich	Dobrichka	Obrochishte, Dobrudzha, Batovo	122	43.4160	27.9410	WGS 84		GPS	T. Trilar, M. Gogala	2005-2020	4.7.2018			BFUS	BFUS	PreservedSpecimen
Other material	TGG-802	I. Gjonov		1	Male	adult	BFUS	Oligoglena tibialis	species	Europe	Bulgaria	BG	Dobrich	Kavarna	Balgarevo, Kaliakra cape	33	43.4160	28.4658	WGS 84		GPS	T. Trilar, M. Gogala	2005-2020	4.7.2016	(Field.No.: 51/16)		BFUS	BFUS	PreservedSpecimen
Other material	TGG-803	I. Gjonov		1	Female	adult	BFUS	Oligoglena tibialis	species	Europe	Bulgaria	BG	Dobrich	Kavarna	Balgarevo, Kaliakra cape	33	43.4160	28.4658	WGS 84		GPS	T. Trilar, M. Gogala	2005-2020	4.7.2016	(Field.No.: 51/16)		BFUS	BFUS	PreservedSpecimen
Other material	TGG-806	M. Gogala, T. Trilar, I. Gjonov		1	Male	adult	PMSL	Oligoglena tibialis	species	Europe	Bulgaria	BG	Dobrich	Dobrichka	Dobrudzha, Batovo	121	43.41617	27.94126	WGS 84		GPS	T. Trilar, M. Gogala	2005-2020	24.6.2016			PMSL	PMSL	PreservedSpecimen
Other material	TGG-807	M. Gogala, T. Trilar, I. Gjonov						Oligoglena tibialis	species	Europe	Bulgaria	BG	Dobrich	Dobrichka	Dobrudzha, Batovo	121	43.41617	27.94126	WGS 84		GPS	T. Trilar, M. Gogala	2005-2020	24.6.2016	recorded				MachineObservation
Other material	TGG-811	M. Gogala, T. Trilar, I. Gjonov, K.						Oligoglena tibialis	species	Europe	Bulgaria	BG	Dobrich	Dobrichka	Obrochishte, Dobrudzha, Batovo	137	43.41692	27.93760	WGS 84		GPS	T. Trilar, M. Gogala	2005-2020	25.6.2016	recorded in the backgound				MachineObservation
Other material	TGG-812	M. Gogala, T. Trilar, I. Gjonov, K. Prosenc Trilar						Oligoglena tibialis	species	Europe	Bulgaria	BG	Dobrich	Dobrichka	Obrochishte, Dobrudzha, Batovo	137	43.41692	27.93760	WGS 84		GPS	T. Trilar, M. Gogala	2005-2020	3.7.2018	recorded				MachineObservation
Other material	TGG-813	M. Gogala, T. Trilar, I. Gjonov, K. Prosenc Trilar		1	Female		PMSL	Oligoglena tibialis	species	Europe	Bulgaria	BG	Dobrich	Dobrichka	Obrochishte, Dobrudzha, Batovo	137	43.41692	27.93760	WGS 84		GPS	T. Trilar, M. Gogala	2005-2020	4.7.2018			PMSL	PMSL	PreservedSpecimen
Other material	TGG-814	M. Gogala, T. Trilar, I. Gjonov, K. Prosenc Trilar						Oligoglena tibialis	species	Europe	Bulgaria	BG	Dobrich	Dobrichka	Obrochishte, Dobrudzha, Batovo	137	43.41692	27.93760	WGS 84		GPS	T. Trilar, M. Gogala	2005-2020	4.7.2018	recorded				MachineObservation
Other material	TGG-820	M. Gogala, T. Trilar, I. Gjonov, K. Prosenc Trilar		2	Male		PMSL	Oligoglena tibialis	species	Europe	Bulgaria	BG	Dobrich	Balchik	Obrochishte, Tsarkva	114	43.42166	28.00691	WGS 84		GPS	T. Trilar, M. Gogala	2005-2020	4.7.2018			PMSL	PMSL	PreservedSpecimen
Other material	TGG-821	M. Gogala, T. Trilar, I. Gjonov, K. Prosenc Trilar		1	Female		PMSL	Oligoglena tibialis	species	Europe	Bulgaria	BG	Dobrich	Balchik	Obrochishte, Tsarkva	114	43.42166	28.00691	WGS 84		GPS	T. Trilar, M. Gogala	2005-2020	4.7.2018			PMSL	PMSL	PreservedSpecimen
Other material	TGG-822	M. Gogala, T. Trilar, I. Gjonov, K. Prosenc Trilar						Oligoglena tibialis	species	Europe	Bulgaria	BG	Dobrich	Balchik	Obrochishte, Tsarkva	114	43.42166	28.00691	WGS 84		GPS	T. Trilar, M. Gogala	2005-2020	4.7.2018	recorded				MachineObservation
Other material	TGG-827	I. Gjonov						Oligoglena tibialis	species	Europe	Bulgaria	BG	Dobrich	Kavarna	Black Sea Coast, Kamen bryag	10	43.451	28.543	WGS 84		GPS	I. Gjonov	2005-2020	22.6.2014	recorded				MachineObservation
Other material	TGG-828	I. Gjonov		2	Male	adult	BFUS	Oligoglena tibialis	species	Europe	Bulgaria	BG	Dobrich	Kavarna	Black Sea Coast, Kamen bryag	10	43.4510	28.5430	WGS 84		GPS	T. Trilar, M. Gogala	2005-2020	22.6.2014	(Field.No.: 57/14)		BFUS	BFUS	PreservedSpecimen
Other material	TGG-829	I. Gjonov		1	Female	adult	BFUS	Oligoglena tibialis	species	Europe	Bulgaria	BG	Dobrich	Kavarna	Black Sea Coast, Kamen bryag	10	43.4510	28.5430	WGS 84		GPS	T. Trilar, M. Gogala	2005-2020	22.6.2014	(Field.No.: 57/14)		BFUS	BFUS	PreservedSpecimen
Other material	TGG-834	M. Gogala, T. Trilar, I. Gjonov, K. Prosenc Trilar						Oligoglena tibialis	species	Europe	Bulgaria	BG	Dobrich	Kavarna	Shabla, Vidno	100	43.54360	28.37625	WGS 84		GPS	T. Trilar, M. Gogala	2005-2020	2.7.2018	recorded				MachineObservation
Other material	TGG-835							Oligoglena tibialis	species	Europe	Bulgaria	BG	Dobrich	Dobrich	Dobrich	210	43.584869	27.836557	WGS 84	T. Trilar, I. Gjonov, M. Gogala	paper			7.7.1961	IPC (Tx), Morus alba, 7. 7. 1961; 1M	Pelov 1968 as Cicadetta tibialis Panz.			LiteratureRecord
Other material	TGG-838	M. Gogala, T. Trilar, I. Gjonov, K. Prosenc Trilar						Oligoglena tibialis	species	Europe	Bulgaria	BG	Dobrich	Kavarna	Shabla, Neykovo	78	43.59126	28.41014	WGS 84		GPS	T. Trilar, M. Gogala	2005-2020	2.7.2018	recorded				MachineObservation
Other material	TGG-843	M. Gogala, T. Trilar, I. Gjonov, K. Prosenc Trilar						Oligoglena tibialis	species	Europe	Bulgaria	BG	Dobrich	Kavarna	Shabla, Neykovo	78	43.60001	28.41852	WGS 84		GPS	T. Trilar, M. Gogala	2005-2020	2.7.2018	recorded				MachineObservation
Other material	TGG-846							Oligoglena tibialis	species	Europe	Bulgaria	BG	Veliko Tarnovo	Svishtov	Svishtov	75	43.618	25.350	WGS 84	T. Trilar, I. Gjonov, M. Gogala	paper					Nedyalkov 1908 as Cicadetta tibialis Panz.			LiteratureRecord
Other material	TGG-848	Dr. Buresch		1	Female	adult	SOFM	Oligoglena tibialis	species	Europe	Bulgaria	BG	Razgrad	Zavet	Voden (Deliorman, Sheke-Machzarja-Pasha near Razgrad)	227	43.688	26.689	WGS 84	T. Trilar, I. Gjonov, M. Gogala	label	T. Trilar, M. Gogala	2005-2020	5.7.1923			SOFM	SOFM	PreservedSpecimen
Other material	TGG-855	A. Popov		4	Female	adult	SOFM	Oligoglena tibialis	species	Europe	Bulgaria	BG	Ruse	Ruse	Ruse	70	43.835	25.965	WGS 84	T. Trilar, I. Gjonov, M. Gogala	label	T. Trilar, M. Gogala	2005-2020	26.6.1963			SOFM	SOFM	PreservedSpecimen
