# Supplementary material for: Checklist and provisional atlas of singing cicadas (Hemiptera: Cicadidae) of Bulgaria, based on bioacoustics
Source: Biodivers Data J. 2020 Oct 9;8:e54424. doi: 10.3897/BDJ.8.e54424 (PMC7567745; doi:10.3897/BDJ.8.e54424)
Supplement: Supplementary material 16 — Tibicina haematodes faunistic data. Checklist and provisional atlas of singing cicadas (Hemiptera: Cicadidae) of Bulgaria, based on bioacoustics [file bdj-08-e54424-s016.csv]

typeStatus	catalogNumber	recordedBy	individualID	individualCount	sex	lifeStage	disposition	scientificName	taxonRank	continent	country	countryCode	stateProvince	municipality	locality	minimumElevationInMeters	decimalLatitude	decimalLongitude	geodeticDatum	georeferencedBy	georeferenceProtocol	identifiedBy	dateIdentified	eventDate	fieldNotes	bibliographicCitation	institutionCode	collectionCode	basisOfRecord
Other material	TGG-117	M. Gogala						Tibicina haematodes	species	Europe	Bulgaria	BG	Kardzhali	Momchilgrad	Karamfil	500	41.47401	25.54603	WGS 84		GPS	T. Trilar, M. Gogala	2005-2020	4.7.2012	heared				HumanObservation
Other material	TGG-159	T. Trilar, I. Gjonov						Tibicina haematodes	species	Europe	Bulgaria	BG	Haskovo	Ivaylovgrad	Huhla	173	41.57555	26.07253	WGS 84		GPS	T. Trilar, M. Gogala	2005-2020	6.7.2019	recorded				MachineObservation
Other material	TGG-175	T. Trilar, I. Gjonov						Tibicina haematodes	species	Europe	Bulgaria	BG	Kardzhali	Kardzhali	Topolchane	421	41.61805	25.32474	WGS 84		GPS	T. Trilar, M. Gogala	2005-2020	2.7.2019	song heard				HumanObservation
Other material	TGG-190	M. Gogala, T. Trilar, I. Gjonov, K. Prosenc Trilar						Tibicina haematodes	species	Europe	Bulgaria	BG	Haskovo	Lyubimets	Valche pole, Sheynovets Mt.	681	41.71525	26.02861	WGS 84		GPS	T. Trilar, M. Gogala	2005-2020	9.7.2018	song heard				HumanObservation
Other material	TGG-196	M. Gogala, T. Trilar, I. Gjonov, K. Prosenc Trilar						Tibicina haematodes	species	Europe	Bulgaria	BG	Haskovo	Lyubimets	Mezek, Sheynovets Mt.	370	41.72536	26.06893	WGS 84		GPS	T. Trilar, M. Gogala	2005-2020	9.7.2018	song heard				HumanObservation
Other material	TGG-201	M. Gogala, T. Trilar, I. Gjonov, K. Prosenc Trilar		1	Female	adult	PMSL	Tibicina haematodes	species	Europe	Bulgaria	BG	Haskovo	Lyubimets	Malko Gradishte, Gorata	437	41.73971	25.97888	WGS 84		GPS	T. Trilar, M. Gogala	2005-2020	11.7.2018			PMSL	PMSL	PreservedSpecimen
Other material	TGG-202	M. Gogala, T. Trilar, I. Gjonov, K. Prosenc Trilar						Tibicina haematodes	species	Europe	Bulgaria	BG	Haskovo	Lyubimets	Malko Gradishte, Gorata	437	41.73971	25.97888	WGS 84		GPS	T. Trilar, M. Gogala	2005-2020	11.7.2018	recorded				MachineObservation
Other material	TGG-213	M. Gogala, T. Trilar, I. Gjonov, K. Prosenc Trilar						Tibicina haematodes	species	Europe	Bulgaria	BG	Haskovo	Lyubimets	Malko Gradishte, Gorata	290	41.75423	25.98328	WGS 84		GPS	T. Trilar, M. Gogala	2005-2020	6.7.2018	recorded				MachineObservation
Other material	TGG-225	M. Gogala, T. Trilar, I. Gjonov, K. Prosenc Trilar						Tibicina haematodes	species	Europe	Bulgaria	BG	Haskovo	Lyubimets	Malko Gradishte, Gorata	289	41.75423	25.98339	WGS 84		GPS	T. Trilar, M. Gogala	2005-2020	11.7.2018	song heard				HumanObservation
Other material	TGG-412	J. Milde		4	Male	adult	ZISB	Tibicina haematodes	species	Europe	Bulgaria	BG	Pazardzhik	Belovo	Belovo	415	42.216	24.001	WGS 84	T. Trilar, I. Gjonov, M. Gogala	label	T. Trilar, M. Gogala	2005-2020				ZISB	ZISB	PreservedSpecimen
Other material	TGG-413	J. Milde		2	Female	adult	ZISB	Tibicina haematodes	species	Europe	Bulgaria	BG	Pazardzhik	Belovo	Belovo	415	42.216	24.001	WGS 84	T. Trilar, I. Gjonov, M. Gogala	label	T. Trilar, M. Gogala	2005-2020				ZISB	ZISB	PreservedSpecimen
Other material	TGG-503	M. Dimitrova		1	Male	adult	BFUS	Tibicina haematodes	species	Europe	Bulgaria	BG	Sofia City	Sofia	Lozen, surroundings	710	42.601301	23.482471	WGS 84	T. Trilar, I. Gjonov, M. Gogala	label	T. Trilar, M. Gogala	2005-2020	11.6.2018			BFUS	BFUS	PreservedSpecimen
Other material	TGG-514							Tibicina haematodes	species	Europe	Bulgaria	BG	Plovdiv	Karlovo	Kalofer, Kaloferski monastery (Калоферски манастиръ)	585	42.655	24.958	WGS 84	T. Trilar, I. Gjonov, M. Gogala	paper			1.7.1898 - 31.7.1898		Yoakimov 1909 as Cicadetta cariacea Stahl.			LiteratureRecord
Other material	TGG-572	M. Gogala, T. Trilar, I. Gjonov						Tibicina haematodes	species	Europe	Bulgaria	BG	Sliven	Sliven	Karandila, Sotirya	498	42.72441	26.41114	WGS 84		GPS	T. Trilar, M. Gogala	2005-2020	22.6.2016	recorded				MachineObservation
Other material	TGG-580	M. Gogala, T. Trilar, I. Gjonov						Tibicina haematodes	species	Europe	Bulgaria	BG	Sliven	Sliven	Karandila, Ichera	592	42.73740	26.41334	WGS 84		GPS	T. Trilar, M. Gogala	2005-2020	22.6.2016	song heard				HumanObservation
Other material	TGG-593	N. Atanassov		1	Male	adult	SOFM	Tibicina haematodes	species	Europe	Bulgaria	BG	Sliven	Sliven	Slivenski balkan, Kachulka peak	1072	42.768	26.191	WGS 84	T. Trilar, I. Gjonov, M. Gogala	label	T. Trilar, M. Gogala	2005-2020				SOFM	SOFM	PreservedSpecimen
Other material	TGG-611	M. Gogala, T. Trilar, I. Gjonov						Tibicina haematodes	species	Europe	Bulgaria	BG	Lovech	Teteven	Vasilyovska Mt., Vasilyovska reka, at the end of the valley	794	42.87157	24.43875	WGS 84		GPS	T. Trilar, M. Gogala	2005-2020	30.6.2018	song heard				HumanObservation
Other material	TGG-622	M. Gogala, T. Trilar, I. Gjonov, K. Prosenc Trilar						Tibicina haematodes	species	Europe	Bulgaria	BG	Burgas	Ruen	Dobromir	134	42.92858	27.28668	WGS 84		GPS	T. Trilar, M. Gogala	2005-2020	5.7.2018	recorded				MachineObservation
Other material	TGG-629	I. Gjonov						Tibicina haematodes	species	Europe	Bulgaria	BG	Varna	Dolni Chiflik	Golitsa	108	42.95194	27.55444	WGS 84		GPS	I. Gjonov	2005-2020	25.7.2011	recorded				MachineObservation
Other material	TGG-634	M. Gogala, T. Trilar, I. Gjonov						Tibicina haematodes	species	Europe	Bulgaria	BG	Varna	Dolni Chiflik	Golitsa	215	42.95495	27.56103	WGS 84		GPS	T. Trilar, M. Gogala	2005-2020	24.6.2016	recorded				MachineObservation
Other material	TGG-635	M. Gogala, T. Trilar, I. Gjonov, K. Prosenc Trilar						Tibicina haematodes	species	Europe	Bulgaria	BG	Lovech	Teteven	Teteven, Polaten	357	42.96055	24.19970	WGS 84		GPS	T. Trilar, M. Gogala	2005-2020	1.7.2018	song heard				HumanObservation
Other material	TGG-640	I. Gjonov						Tibicina haematodes	species	Europe	Bulgaria	BG	Varna	Dolni Chiflik	Staro Oryahovo	175	42.96333	27.77778	WGS 84		GPS	I. Gjonov	2005-2020	24.7.2011	song heard				HumanObservation
Other material	TGG-644	I. Gjonov						Tibicina haematodes	species	Europe	Bulgaria	BG	Varna	Dolni Chiflik	Goren Chiflik	102	42.98139	27.58056	WGS 84		GPS	I. Gjonov	2005-2020	25.7.2011	song heard				HumanObservation
Other material	TGG-652	M. Gogala, T. Trilar, I. Gjonov						Tibicina haematodes	species	Europe	Bulgaria	BG	Lovech	Teteven	Glozhene, Asen	277	43.03933	24.22221	WGS 84		GPS	T. Trilar, M. Gogala	2005-2020	30.6.2018	song heard				HumanObservation
Other material	TGG-671	M. Gogala, T. Trilar, I. Gjonov						Tibicina haematodes	species	Europe	Bulgaria	BG	Lovech	Lukovit	Lukovit, Rumyantsevo	191	43.11753	24.14836	WGS 84		GPS	T. Trilar, M. Gogala	2005-2020	30.6.2018	song heard				HumanObservation
Other material	TGG-681							Tibicina haematodes	species	Europe	Bulgaria	BG	Lovech	Lukovit	Karlukovo (gara Karlukovo)	260	43.166	24.067	WGS 84	T. Trilar, I. Gjonov, M. Gogala	paper			1.7.1908 - 31.7.1908		Yoakimov 1909			LiteratureRecord
Other material	TGG-693	M. Gogala, T. Trilar, I. Gjonov, K. Prosenc Trilar						Tibicina haematodes	species	Europe	Bulgaria	BG	Varna	Devnya	Devnya, Manastir	203	43.18960	27.54356	WGS 84		GPS	T. Trilar, M. Gogala	2005-2020	5.7.2018	song heard				HumanObservation
Other material	TGG-696	M. Gogala, T. Trilar, I. Gjonov, K. Prosenc Trilar						Tibicina haematodes	species	Europe	Bulgaria	BG	Targovishte	Targovishte	Targovishte, Prolaz	274	43.19843	26.50878	WGS 84		GPS	T. Trilar, M. Gogala	2005-2020	1.7.2018	song heard				HumanObservation
Other material	TGG-697	G. Peschev		1	Male	adult	SOFM	Tibicina haematodes	species	Europe	Bulgaria	BG	Veliko Tarnovo	Pavlikeni	Byala Cherkva (Pavlikensko, Biala Tscherkova)	110	43.205	25.311	WGS 84	T. Trilar, I. Gjonov, M. Gogala	label	T. Trilar, M. Gogala	2005-2020	5.7.1957			SOFM	SOFM	PreservedSpecimen
Other material	TGG-698	G. Peshev		1	Male	adult	ZISB	Tibicina haematodes	species	Europe	Bulgaria	BG	Veliko Tarnovo	Pavlikeni	Byala Cherkva	110	43.205	25.311	WGS 84	T. Trilar, I. Gjonov, M. Gogala	label	T. Trilar, M. Gogala	2005-2020	21.6.1955			ZISB	ZISB	PreservedSpecimen
Other material	TGG-699	S. Minkova		1	Male	adult	SOFM	Tibicina haematodes	species	Europe	Bulgaria	BG	Vratsa	Vratsa	Vratsa	360	43.210	23.552	WGS 84	T. Trilar, I. Gjonov, M. Gogala	label	T. Trilar, M. Gogala	2005-2020	5.7.1953			SOFM	SOFM	PreservedSpecimen
Other material	TGG-700	S. Minkova		1	Female	adult	SOFM	Tibicina haematodes	species	Europe	Bulgaria	BG	Vratsa	Vratsa	Vratsa	360	43.210	23.552	WGS 84	T. Trilar, I. Gjonov, M. Gogala	label	T. Trilar, M. Gogala	2005-2020	5.7.1953			SOFM	SOFM	PreservedSpecimen
Other material	TGG-706	S. Minkowa		1	Male	adult	SOFM	Tibicina haematodes	species	Europe	Bulgaria	BG	Vratsa	Vratsa	Vratsa	360	43.211	23.552	WGS 84	T. Trilar, I. Gjonov, M. Gogala	label	T. Trilar, M. Gogala	2005-2020	12.7.1953			SOFM	SOFM	PreservedSpecimen
Other material	TGG-720	N. Karnoschitzky		2	Male	adult	SOFM	Tibicina haematodes	species	Europe	Bulgaria	BG	Varna	Varna	Varna (the label is not completely readable)	60	43.214	27.914	WGS 84	T. Trilar, I. Gjonov, M. Gogala	label	T. Trilar, M. Gogala	2005-2020	20.6.1948			SOFM	SOFM	PreservedSpecimen
Other material	TGG-721	N. Karnoschitzky		1	Female	adult	SOFM	Tibicina haematodes	species	Europe	Bulgaria	BG	Varna	Varna	Varna (the label is not completely readable)	60	43.214	27.914	WGS 84	T. Trilar, I. Gjonov, M. Gogala	label	T. Trilar, M. Gogala	2005-2020	20.6.1948			SOFM	SOFM	PreservedSpecimen
Other material	TGG-722	N. Karnoschitzky		1	Female	adult	SOFM	Tibicina haematodes	species	Europe	Bulgaria	BG	Varna	Varna	Varna (Stalin)	60	43.214	27.914	WGS 84	T. Trilar, I. Gjonov, M. Gogala	label	T. Trilar, M. Gogala	2005-2020	20.7.1953			SOFM	SOFM	PreservedSpecimen
Other material	TGG-723	N. Karnoschitzky		1	Male	adult	SOFM	Tibicina haematodes	species	Europe	Bulgaria	BG	Varna	Varna	Varna (Stalin)	60	43.214	27.914	WGS 84	T. Trilar, I. Gjonov, M. Gogala	label	T. Trilar, M. Gogala	2005-2020	13.6.1954			SOFM	SOFM	PreservedSpecimen
Other material	TGG-746	N. Stojanova		2	Male	adult	SOFM	Tibicina haematodes	species	Europe	Bulgaria	BG	Veliko Tarnovo	Pavlikeni	Pavlikeni	120	43.238	25.306	WGS 84	T. Trilar, I. Gjonov, M. Gogala	label	T. Trilar, M. Gogala	2005-2020	20.8.1939			SOFM	SOFM	PreservedSpecimen
Other material	TGG-756	M. Gogala, T. Trilar, I. Gjonov, K. Prosenc Trilar						Tibicina haematodes	species	Europe	Bulgaria	BG	Varna	Varna	Varna, Vinitsa	191	43.25151	28.00015	WGS 84		GPS	T. Trilar, M. Gogala	2005-2020	4.7.2018	recorded in the backgound				MachineObservation
Other material	TGG-778	I. Gjonov		1	Male	adult	BFUS	Tibicina haematodes	species	Europe	Bulgaria	BG	Pleven	Pleven	Tarnene	70	43.3814	24.4864	WGS 84		GPS	T. Trilar, M. Gogala	2005-2020	13.6.2001			BFUS	BFUS	PreservedSpecimen
Other material	TGG-791	M. Gogala, T. Trilar, I. Gjonov		1	Male	adult	PMSL	Tibicina haematodes	species	Europe	Bulgaria	BG	Dobrich	Kavarna	Balgarevo (Bulgarevo), Kaliakra cape	61	43.38645	28.45287	WGS 84		GPS	T. Trilar, M. Gogala	2005-2020	24.6.2016			PMSL	PMSL	PreservedSpecimen
Other material	TGG-818	M. Gogala, T. Trilar, I. Gjonov, K. Prosenc Trilar						Tibicina haematodes	species	Europe	Bulgaria	BG	Dobrich	Dobrichka	Obrochishte, Batovo	137	43.41692	27.93760	WGS 84		GPS	T. Trilar, M. Gogala	2005-2020	3.7.2018	recorded				MachineObservation
Other material	TGG-826	M. Gogala, T. Trilar, I. Gjonov, K. Prosenc Trilar						Tibicina haematodes	species	Europe	Bulgaria	BG	Dobrich	Balchik	Obrochishte, Tsarkva	114	43.42166	28.00691	WGS 84		GPS	T. Trilar, M. Gogala	2005-2020	4.7.2018	recorded				MachineObservation
Other material	TGG-836							Tibicina haematodes	species	Europe	Bulgaria	BG	Dobrich	Dobrich	Dobrich	210	43.584869	27.836557	WGS 84	T. Trilar, I. Gjonov, M. Gogala	paper			29.6.1961		Pelov 1968			LiteratureRecord
Other material	TGG-849	no legit information		1	Male	adult	BFUS	Tibicina haematodes	species	Europe	Bulgaria	BG	Dobrich	Dobrich	Vodnyatsi	200	43.746	27.548	WGS 84	T. Trilar, I. Gjonov, M. Gogala	label	T. Trilar, M. Gogala	2005-2020	21.6.2012			BFUS	BFUS	PreservedSpecimen
Other material	TGG-851	P. Drenski		2	Male	adult	SOFM	Tibicina haematodes	species	Europe	Bulgaria	BG	Dobrich	Tervel	Tervel (Tervelsko, Usoite)	230	43.748	27.406	WGS 84	T. Trilar, I. Gjonov, M. Gogala	label	T. Trilar, M. Gogala	2005-2020	15.6.1952			SOFM	SOFM	PreservedSpecimen
Other material	TGG-852	P. Drenski		2	Female	adult	SOFM	Tibicina haematodes	species	Europe	Bulgaria	BG	Dobrich	Tervel	Tervel (Tervelsko, Usoite)	230	43.748	27.406	WGS 84	T. Trilar, I. Gjonov, M. Gogala	label	T. Trilar, M. Gogala	2005-2020	15.6.1952			SOFM	SOFM	PreservedSpecimen
Other material	TGG-854	N. Nedelkow		1	Female	adult	SOFM	Tibicina haematodes	species	Europe	Bulgaria	BG	Montana	Lom	Lom	35	43.817	23.238	WGS 84	T. Trilar, I. Gjonov, M. Gogala	label	T. Trilar, M. Gogala	2005-2020				SOFM	SOFM	PreservedSpecimen
Other material	TGG-862	A. Popov		2	Female	adult	SOFM	Tibicina haematodes	species	Europe	Bulgaria	BG	Ruse	Ruse	Ruse	70	43.835	25.965	WGS 84	T. Trilar, I. Gjonov, M. Gogala	label	T. Trilar, M. Gogala	2005-2020	28.6.1953			SOFM	SOFM	PreservedSpecimen
Other material	TGG-864	G. Peschev		2	Female	adult	SOFM	Tibicina haematodes	species	Europe	Bulgaria	BG	Silistra	Alfatar	Dulovo, Karakuz forest	230	43.896	27.217	WGS 84	T. Trilar, I. Gjonov, M. Gogala	label	T. Trilar, M. Gogala	2005-2020	10.7.1952			SOFM	SOFM	PreservedSpecimen
Other material	TGG-865	M. Keremedchiev		1	Male	adult	SOFM	Tibicina haematodes	species	Europe	Bulgaria	BG	Silistra	Alfatar	Dulovo, Karakuz forest	230	43.896	27.217	WGS 84	T. Trilar, I. Gjonov, M. Gogala	label	T. Trilar, M. Gogala	2005-2020	1.6.1952 - 10.6.1952			SOFM	SOFM	PreservedSpecimen
